# Supplementary material for: Ortho-vanillin derived Al(iii) and Co(iii) catalyst systems for switchable catalysis using ε-decalactone, phthalic anhydride and cyclohexene oxide
Source: Royal Society of Chemistry journal article supplement (doi:10.1039/d0cy02164d), 2021-01-01
Supplement: d0cy02164d1.pdf [file d0cy02164d1.pdf]

## **Electronic Supplementary Information**

**For**

### ***Ortho*-Vanillin Derived Al(III) and Co(III) Catalyst Systems for Switchable Catalysis using $\epsilon$ -Decalactone, Phthalic Anhydride and Cyclohexene Oxide**

Wilfred T. Diment,<sup>a</sup> Tim Stößer,<sup>a</sup> Ryan W. F. Kerr,<sup>a</sup> Andreas  
Phanopoulos,<sup>a</sup> Christopher B. Durr,<sup>a</sup> Charlotte K. Williams<sup>a\*</sup>

*Chemistry Research Laboratory, Department of Chemistry,  
University of Oxford, 12 Mansfield Road, Oxford, OX1 3TA, UK.*

## Contents

|                                                                                                                                                                                                                                                 |           |
|-------------------------------------------------------------------------------------------------------------------------------------------------------------------------------------------------------------------------------------------------|-----------|
| <b>General Procedures .....</b>                                                                                                                                                                                                                 | <b>4</b>  |
| <b>Methods .....</b>                                                                                                                                                                                                                            | <b>5</b>  |
| <b>Synthesis of Catalysts.....</b>                                                                                                                                                                                                              | <b>6</b>  |
| <b>Crystallographic Data for Complexes 1, 2 and 3.....</b>                                                                                                                                                                                      | <b>9</b>  |
| <b>Representative Polymerization .....</b>                                                                                                                                                                                                      | <b>11</b> |
| <b>End Group Analysis by <math>^{31}\text{P}\{^1\text{H}\}</math> NMR Spectroscopy .....</b>                                                                                                                                                    | <b>11</b> |
| <b>Figure S1. <math>^1\text{H}</math> NMR Spectrum (400 MHz, 298 K, <math>\text{CDCl}_3</math>) of complex 1. ....</b>                                                                                                                          | <b>12</b> |
| <b>Figure S2. <math>^1\text{H}</math> COSY NMR Spectrum (400 MHz, 298 K, <math>\text{CDCl}_3</math>) of complex 1. ....</b>                                                                                                                     | <b>12</b> |
| <b>Figure S3. <math>^{13}\text{C}\{^1\text{H}\}</math> NMR Spectrum (500 MHz, 298 K, <math>\text{CDCl}_3</math>) of complex 1.....</b>                                                                                                          | <b>13</b> |
| <b>Figure S4. <math>^1\text{H}</math>-<math>^{13}\text{C}</math> HSQC NMR Spectrum (298 K, <math>\text{CDCl}_3</math>) of complex 1.....</b>                                                                                                    | <b>13</b> |
| <b>Figure S5. <math>^1\text{H}</math>-<math>^{13}\text{C}</math> HMBC NMR Spectrum (298 K, <math>\text{CDCl}_3</math>) of complex 1.....</b>                                                                                                    | <b>14</b> |
| <b>Figure S6. <math>^{27}\text{Al}</math> NMR Spectrum (104 MHz, 298 K, <math>\text{CDCl}_3</math>) of complex 1. ....</b>                                                                                                                      | <b>14</b> |
| <b>Figure S7. <math>^1\text{H}</math> NMR Spectrum (400 MHz, 298 K, <math>\text{CDCl}_3</math>) of complex 2. ....</b>                                                                                                                          | <b>15</b> |
| <b>Figure S8. <math>^1\text{H}</math> COSY NMR Spectrum (400 MHz, 298 K, <math>\text{CDCl}_3</math>) of complex 2. ....</b>                                                                                                                     | <b>15</b> |
| <b>Figure S9. <math>^{13}\text{C}\{^1\text{H}\}</math> NMR Spectrum (500 MHz, 298 K, <math>\text{CDCl}_3</math>) of complex 2. ....</b>                                                                                                         | <b>16</b> |
| <b>Figure S11. <math>^1\text{H}</math>-<math>^{13}\text{C}</math> HMBC NMR Spectrum (298 K, <math>\text{CDCl}_3</math>) of complex 2.....</b>                                                                                                   | <b>17</b> |
| <b>Figure S12. <math>^1\text{H}</math> NMR Spectrum (400 MHz, 298 K, <math>\text{CDCl}_3</math>) of complex 3. ....</b>                                                                                                                         | <b>18</b> |
| <b>Figure S13. <math>^1\text{H}</math> COSY NMR Spectrum (400 MHz, 298 K, <math>\text{CDCl}_3</math>) of complex 3. ....</b>                                                                                                                    | <b>18</b> |
| <b>Figure S14. <math>^{13}\text{C}\{^1\text{H}\}</math> NMR Spectrum (500 MHz, 298 K, <math>\text{CDCl}_3</math>) of complex 3.....</b>                                                                                                         | <b>19</b> |
| <b>Figure S15. <math>^1\text{H}</math>-<math>^{13}\text{C}</math> HSQC NMR Spectrum (298 K, <math>\text{CDCl}_3</math>) of complex 3.....</b>                                                                                                   | <b>19</b> |
| <b>Figure S16. <math>^1\text{H}</math>-<math>^{13}\text{C}</math> HMBC NMR Spectrum (298 K, <math>\text{CDCl}_3</math>) of complex 3.....</b>                                                                                                   | <b>20</b> |
| <b>Figure S17. <math>^{27}\text{Al}</math> NMR Spectrum (104 MHz, 298 K, <math>\text{CDCl}_3</math>) of complex 3. ....</b>                                                                                                                     | <b>20</b> |
| <b>Table S5. Polymerisation data for the ROCOP of PA and CHO Utilising Complexes 1, 2 and SalcyCrCl showing complete PA consumption.....</b>                                                                                                    | <b>20</b> |
| <b>Figure S18. GPC traces for PCHPE synthesised by complexes 1, 2, and [SalcyCrCl],.....</b>                                                                                                                                                    | <b>21</b> |
| <b>Figure S19. GPC traces for PCHPE synthesised by complexes 1, 2, and [SalcyCrCl], corresponding to Table 1, Entries 1, 2, and 3, respectively. ....</b>                                                                                       | <b>21</b> |
| <b>Figure S20. GPC traces for PCHPE synthesised by complexes 1, 2, and [SalcyCrCl], corresponding to Table 1, Entries 4, 5, and 6, respectively. ....</b>                                                                                       | <b>22</b> |
| <b>Figure S21. a) GPC traces for PCHPE synthesised with complex 2, showing that 10 equivalents are necessary to yield monomodal molecular weight distributions. b) MALDI-ToF spectrum of PCHPE synthesised with 10 equivalents of CHD. ....</b> | <b>22</b> |
| <b>Figure S22. <math>^{31}\text{P}\{^1\text{H}\}</math> NMR Spectrum (298 K, 162 MHz, <math>\text{CDCl}_3</math>) of PDL-<i>b</i>-PCHPE-<i>b</i>-PDL (Table 2, Entry 1), and the corresponding spectra for PDL and PCHPE homopolymers. ....</b> | <b>23</b> |
| <b>Figure S23. DOSY NMR Spectrum (298 K, <math>\text{CDCl}_3</math>) of PDL-<i>b</i>-PCHPE-<i>b</i>-PDL (Table 2, Entry 1) showing a single diffusion coefficient, consistent with formation of a triblock copolymer. ....</b>                  | <b>24</b> |

|                                                                                                                                  |           |
|----------------------------------------------------------------------------------------------------------------------------------|-----------|
| <b>Figure S24.</b> GPC traces for triblock copolymers synthesised with complex <b>1</b> .....                                    | <b>24</b> |
| <b>Figure S26.</b> DSC heating curves for triblock synthesised with complex <b>1</b> , showing the $T_g$ for the PDL block. .... | <b>25</b> |
| <b>References</b> .....                                                                                                          | <b>25</b> |

## General Procedures

### Materials

Triethyl aluminium (93%) and cobalt (II) acetate tetrahydrate were purchased from Sigma-Aldrich. Both were used as received. Solvents used for air-sensitive synthesis were collected from a solvent purification system (SPS), degassed with freeze-pump-thaw cycles and stored over 3 Å molecular sieves under an inert atmosphere.

Cyclohexene oxide (Acros Organics) was purified according to the method reported by Greiner *et al.*<sup>1</sup> Sodium hydride was added to cyclohexene oxide under an inert atmosphere, followed by addition of methyl iodide (the sodium hydride acts as both a drying agent, and deprotonates any residual diols present in the epoxide, which are subsequently methylated upon methyl iodide addition). The cyclohexene oxide was subsequently isolated *via* fractional distillation under reduced pressure. Purification of phthalic anhydride (Sigma Aldrich) was achieved through stirring in dry toluene. The supernatant was filtered, and the toluene subsequently removed *in vacuo*. The resultant white powder recrystallised from hot (60 °C) chloroform and subsequently sublimed under vacuum at 80 °C.  $\epsilon$ -Decalactone (Sigma Aldrich) was dried over CaH<sub>2</sub>, followed by fractional distillation at 130 °C under reduced pressure. 1,2-Cyclohexanediol (Sigma Aldrich) was recrystallised from dry ethyl acetate. All materials were stored under a nitrogen atmosphere, in a glovebox. The proligand, L<sub>van</sub>H<sub>2</sub>, was synthesised through the Schiff base condensation reaction of *o*-vanillin with 2,2-dimethyl-1,3-propanediamine.<sup>2</sup>

## Methods

**NMR Spectroscopy:**  $^1\text{H}$  NMR,  $^{27}\text{Al}$  and  $^{31}\text{P}\{^1\text{H}\}$  spectra were obtained using a Bruker Avance III HD 400 NMR spectrometer.  $^{13}\text{C}\{^1\text{H}\}$  NMR were obtained using a Bruker AV III HD 500 MHz NMR spectrometer.

**GPC analysis:** Carried out using a Shimadzu LC-20AD instrument, equipped with a Refractive Index (RI) detector and two PSS SDV 5  $\mu\text{m}$  linear M columns. The eluent used was HPLC-grade THF, heated to 30  $^{\circ}\text{C}$ , and with a flow rate of 1.0  $\text{mL min}^{-1}$ .

**MALDI-ToF spectrometry:** Carried out on a Bruker Autoflex Speed MALDI-ToF. Samples were prepared by preparing a solution of polymer (10  $\text{mg mL}^{-1}$  in THF), dithranol (10  $\text{mg mL}^{-1}$  in THF) and KTFA (10  $\text{mg mL}^{-1}$  in THF) in a 1:4:1 ratio, which was subsequently spotted onto a plate and allowed to completely dry before analysis.

**Elemental analysis** was carried out by Mr Stephen Boyer at London Metropolitan University.

**DSC:** Analysis of triblock copolymers was carried out using a DSC3+ (Mettler-Toledo, Ltd). The triblock polyesters were heated to 200  $^{\circ}\text{C}$  for 5 minutes to remove thermal history, before heating and cooling from -80 to +200  $^{\circ}\text{C}$  at a rate of 10  $^{\circ}\text{C min}^{-1}$ . Each sample was run for three heating-cooling cycles. Glass transition temperatures ( $T_g$ ) were recorded from the midpoint of the transition during the third heating curve.

**X-Ray Crystallography:** Crystallographic data were collected, and structures solved by Dr Andreas Phanopoulos, Dr Ryan Kerr, and Dr Christopher Durr. Air sensitive crystalline samples were isolated in a nitrogen filled glovebox and immersed in fluorinated oil. Crystalline samples were mounted on a MiTeGen Micromount, and cooled to 150 K with dry nitrogen using an Oxford Cryosystem Cryostream.<sup>3</sup> Data was collected using an Oxford Diffraction Supernova

diffractometer using Cu K $\alpha$  ( $\lambda$  = 1.5417 Å) or Mo K $\alpha$  ( $\lambda$  = 0.7107 Å) radiation. The resulting reflection data was processed with CrysAlis Pro.<sup>4</sup> The crystal structure of complex **1** was solved using SHELXT and structure refinement was conducted with SHELXL-14 within the WinGX software package.<sup>5,6</sup> The crystal structures of complexes **2** and **3** were solved using the SHELXT program and least-square refined using the SHELXL program within the Olex2 system suite.<sup>7-9</sup>

## Synthesis of Catalysts

### L<sub>van</sub>AlEt (**1**)

Under an inert atmosphere, AlEt<sub>3</sub> (0.17 g, 1.5 mmol) was added dropwise to a stirring solution of L<sub>van</sub>H<sub>2</sub> (0.57 g, 1.5 mmol) in anhydrous toluene (10 mL) at -30 °C. The reaction mixture was allowed to warm to room temperature, and then stirred for 1 hour. A yellow powder precipitated from the reaction mixture, which was isolated *via* centrifuge, washed with toluene (3 x 10 mL) and hexane (1 x 10 mL) and subsequently dried under vacuum to give **1** as a yellow powder (0.39 g, 1.02 mmol, 68%). X-ray Diffraction quality crystals were grown from a saturated solution of **1** in THF, layered with hexane.

**<sup>1</sup>H NMR** (CDCl<sub>3</sub>, 400 MHz, 298 K);  $\delta$  8.07 (2H, s, H<sup>e</sup>), 6.92 (2H, dd,  $J$  = 7.7 , 1.6 Hz, H<sup>b</sup>), 6.80 (2H, dd,  $J$  = 7.7, 1.6 Hz, H<sup>d</sup>), 6.60 (2H, t,  $J$  = 7.7 Hz, H<sup>c</sup>), 3.96 (2H, d,  $J$  = 12.0 Hz, H<sup>f</sup>), 3.85 (6H, s, H<sup>a</sup>) 3.22 (2H, d,  $J$  = 12.0 Hz, H<sup>g</sup>), 1.14 (3H, s, H<sup>h</sup>), 0.95 (3H, s, H<sup>i</sup>), 0.88 (3H, t,  $J$  = 8.0 Hz), -0.01 (2H, q,  $J$  = 8.0 Hz) ppm. **<sup>13</sup>C NMR** (CDCl<sub>3</sub>, 126 MHz, 298 K);  $\delta$  169.0 (C<sup>h</sup>), 157.7 (C<sup>g</sup>), 151.8 (C<sup>b</sup>), 124.8 (C<sup>e</sup>), 119.0 (C<sup>f</sup>), 117.9 (C<sup>c</sup>), 115.6 (C<sup>d</sup>), 71.0 (C<sup>i</sup>), 56.9 (C<sup>a</sup>), 36.1 (C<sup>j</sup>), 26.0 (C<sup>k</sup>), 23.20 (C<sup>l</sup>), 9.97 (C<sup>n</sup>), 1.2 (C<sup>m</sup>) ppm. **<sup>27</sup>Al NMR** (CDCl<sub>3</sub>, 104 MHz, 298 K): 5.8 ppm. **Anal. Calc.** (C<sub>23</sub>H<sub>29</sub>AlN<sub>2</sub>O<sub>4</sub>); C, 65.08; H, 6.89; N, 6.60. Found: C, 64.95; H, 6.69; N, 6.56.

### L<sub>van</sub>Co(OAc) (**2**)

Under an inert atmosphere,  $[\text{Co}(\text{OAc})_2 \cdot 4\text{H}_2\text{O}]$  (0.45 g, 1.8 mmol) was added to a stirred solution of  $\text{L}_{\text{van}}\text{H}_2$  (0.67 g, 1.8 mmol) in anhydrous THF (10 mL) at 25 °C, resulting in a rapid colour change from yellow to brown. The solution was stirred under an inert atmosphere for 2 hours before being exposed to air and stirred at room temperature for 48 hours, resulting in precipitation of a green powder. The precipitate was isolated *via* centrifuge and was subsequently washed sequentially with THF (3 x 10 mL) and hexane (3 x 10 mL) before being dried under vacuum to give **2** as a green powder (0.54 g, 1.26 mmol, 70%). X-ray Diffraction quality crystals were grown from a saturated solution of **1** in DCM, layered with hexane.

**$^1\text{H}$  NMR** ( $\text{CDCl}_3$ , 400 MHz, 298 K);  $\delta$  7.52f (1H, s,  $\text{H}^{\text{e}}$ ), 7.18 (1H, s,  $\text{H}^{\text{e}'}$ ), 6.92-6.87f (3H, m,  $\text{H}^{\text{d}}$ ,  $\text{H}^{\text{d}'}$ ,  $\text{H}^{\text{b}}$ ), 6.56-6.55 (2H, m,  $\text{H}^{\text{c}}$  and  $\text{H}^{\text{b}'}$ ), 6.47 (1H, m,  $\text{H}^{\text{c}'}$ ), 4.63 (1H, d,  $^2J = 10.5$  Hz,  $\text{H}^{\text{f}}$ ), 3.88 (s, 3H,  $\text{H}^{\text{a}}$ ), 3.56 (s, 3H,  $\text{H}^{\text{a}'}$ ), 3.40 (1H, d,  $^2J = 10.5$  Hz,  $\text{H}^{\text{g}}$ ), 3.28 (1H, d,  $^2J = 13.0$  Hz  $\text{H}^{\text{f}'}$ ), 2.87 (1H, d,  $^2J = 13.0$  Hz,  $\text{H}^{\text{g}'}$ ), 1.85 (3H, s,  $\text{H}^{\text{i}}$ ), 1.17 (3H, s,  $\text{H}^{\text{h}}$ ), 0.92 (3H, s,  $\text{H}^{\text{i}}$ ) ppm.  **$^{13}\text{C}$  NMR** ( $\text{CDCl}_3$ , 126 MHz, 298 K);  $\delta$  193.5 ( $\text{C}^{\text{m}}$ ), 168.4 ( $\text{C}^{\text{h}}$ ), 166.8 ( $\text{C}^{\text{h}'}$ ), 160.4 ( $\text{C}^{\text{f}}$ ), 157.9 ( $\text{C}^{\text{f}'}$ ), 155.3 ( $\text{C}^{\text{b}}$ ), 154.4 ( $\text{C}^{\text{b}'}$ ), 125.8 ( $\text{C}^{\text{e}}$ ), 124.7 ( $\text{C}^{\text{g}}$ ), 124.3 ( $\text{C}^{\text{e}'}$ ), 122.2 ( $\text{C}^{\text{g}'}$ ), 117.7 ( $\text{C}^{\text{d}}$ ), 117.1 ( $\text{C}^{\text{d}'}$ ), 115.7 ( $\text{C}^{\text{c}}$ ), 114.9 ( $\text{C}^{\text{c}'}$ ), 70.5 ( $\text{C}^{\text{i+i'}}$ ), 57.4 ( $\text{C}^{\text{a}}$ ), 56.7 ( $\text{C}^{\text{a}'}$ ), 35.4 ( $\text{C}^{\text{j}}$ ), 25.9 ( $\text{C}^{\text{k}}$ ), 23.8 ( $\text{C}^{\text{n}}$ ), 23.3 ( $\text{C}^{\text{l}}$ ) ppm. **Anal. Calc.** ( $\text{C}_{23}\text{H}_{29}\text{AlN}_2\text{O}_4$ ); C, 56.79; H, 5.60; N, 5.76. Found: C, 56.40; H, 5.85; N, 5.59.

### **$\text{L}_{\text{van}}\text{AlOAc}$ (**3**)**

Under an inert atmosphere, glacial AcOH (0.01 mL, 0.19 mmol) was added to a stirred solution of **1** (80 mg, 0.19 mmol) in anhydrous THF (10 mL) at 25 °C. The reaction mixture was stirred for 2 hours, resulting in the precipitation of a yellow powder. The precipitate was isolated *via* centrifuge, before being dried under vacuum to yield **3** as a pale yellow powder (70 mg, 0.15 mmol, 79%). X-ray Diffraction quality crystals were grown from a saturated solution of **1** in  $\text{CHCl}_3$ , layered with hexane.

**<sup>1</sup>H NMR** (CDCl<sub>3</sub>, 400 MHz, 298 K); δ 8.10 (2H, s, H<sup>e</sup>), 6.92 (2H, dd, *J* = 7.7, 1.6 Hz, H<sup>b</sup>), 6.87, (2H, dd, *J* = 7.7, 1.6 Hz, H<sup>d</sup>), 6.62 (2H, t, *J* = 7.7 Hz, H<sup>c</sup>), 3.87 (2H, d, *J* = 11.9 Hz, H<sup>f</sup>), 3.80 (6H, s, H<sup>a</sup>), 3.28 (2H, d, *J* = 11.9 Hz, H<sup>g</sup>), 2.03 (3H, s, H<sup>j</sup>), 1.14 (3H, s, H<sup>h</sup>), 0.93 (3H, s, H<sup>i</sup>) ppm. **<sup>13</sup>C NMR** (CDCl<sub>3</sub>, 126 MHz, 298 K); δ 181.1 (C<sup>m</sup>), 169.4 (C<sup>h</sup>), 158.1 (C<sup>g</sup>), 152.0 (C<sup>b</sup>), 125.3 (C<sup>e</sup>), 119.6 (C<sup>f</sup>), 118.0 (C<sup>c</sup>), 115.8 (C<sup>d</sup>), 69.8 (C<sup>i</sup>), 56.8 (C<sup>a</sup>), 36.8 (C<sup>j</sup>), 25.9 (C<sup>l</sup>), 24.7 (C<sup>k</sup>), 20.5 (C<sup>n</sup>) ppm. **<sup>27</sup>Al NMR** (CDCl<sub>3</sub>, 104 MHz, 298 K): 14.8 ppm. **Anal. Calc.** (C<sub>23</sub>H<sub>29</sub>AlN<sub>2</sub>O<sub>4</sub>); C, 60.79 H, 5.99; N, 6.16. Found: C, 60.77; H, 6.12; N, 6.05.



## Crystallographic Data for Complexes 1, 2 and 3

**Table S1.** Selected bond lengths and angles for complex 1.

| Bond            | Bond Length (Å) | Bond                    | Bond Angle (°) |
|-----------------|-----------------|-------------------------|----------------|
| N (1) – Al (1)  | 2.083(2)        | N (1) – Al (1) – N (2)  | 84.47(10)      |
| N (2) – Al (1)  | 2.020(3)        | N (1) – Al (1) – O (2)  | 87.92(10)      |
| O (2) – Al (1)  | 1.801(2)        | N (1) – Al (1) – O (3)  | 167.80(10)     |
| O (3) – Al (1)  | 1.849(2)        | N (1) – Al (1) – C (22) | 91.45(12)      |
| C (22) – Al (1) | 1.983(3)        | N (2) – Al (1) – O (2)  | 119.25(11)     |
|                 |                 | N (2) – Al (1) – O (3)  | 86.91(10)      |
|                 |                 | N (2) – Al (1) – C (22) | 119.89(13)     |
|                 |                 | O (2) – Al (1) – O (3)  | 88.78(9)       |
|                 |                 | O (2) – Al (1) – C (22) | 120.48(14)     |
|                 |                 | O (3) – Al (1) – C (22) | 100.33(12)     |

**Table S2.** Selected bond lengths and angles for complex 2.

| Bond           | Bond Length (Å) | Bond                   | Bond Angle (°) |
|----------------|-----------------|------------------------|----------------|
| N (1) – Co (1) | 1.9119(13)      | N (1) – Co (1) – N (2) | 93.09(6)       |
| N (2) – Co (1) | 1.9159(14)      | N (1) – Co (1) – O (2) | 92.84(5)       |
| O (2) – Co (1) | 1.8904(12)      | N (1) – Co (1) – O (3) | 95.12(5)       |
| O (3) – Co (1) | 1.8812(12)      | N (1) – Co (1) – O (5) | 163.39(5)      |
| O (5) – Co (1) | 1.9849(11)      | N (1) – Co (1) – O (6) | 96.80(5)       |
| O (6) – Co (1) | 1.9529(11)      | N (2) – Co (1) – O (2) | 173.83(5)      |
|                |                 | N (2) – Co (1) – O (3) | 90.14(5)       |
|                |                 | N (2) – Co (1) – O (5) | 89.43(5)       |
|                |                 | N (2) – Co (1) – O (6) | 91.26(5)       |
|                |                 | O (2) – Co (1) – O (3) | 87.65(5)       |
|                |                 | O (2) – Co (1) – O (5) | 85.37(5)       |
|                |                 | O (2) – Co (1) – O (6) | 89.72(5)       |
|                |                 | O (3) – Co (1) – O (5) | 101.29(5)      |
|                |                 | O (3) – Co (1) – O (6) | 167.90(5)      |
|                |                 | O (5) – Co (1) – O (6) | 66.71(5)       |
|                |                 | O (5) – C (22) – O (6) | 116.65(14)     |

**Table S3.** Selected bond lengths and angles for complex **3**.

| Bond           | Bond Length (Å) | Bond                   | Bond Angle (°) |
|----------------|-----------------|------------------------|----------------|
| N (1) – Al (1) | 1.9977(9)       | N (1) – Al (1) – N (2) | 89.93(4)       |
| N (2) – Al (1) | 2.0127(9)       | N (1) – Al (1) – O (2) | 90.81(3)       |
| O (2) – Al (1) | 1.8240(8)       | N (1) – Al (1) – O (3) | 103.42(4)      |
| O (3) – Al (1) | 1.8162(8)       | N (1) – Al (1) – O (5) | 157.05(4)      |
| O (5) – Al (1) | 1.9935(8)       | N (1) – Al (1) – O (6) | 91.35(3)       |
| O (6) – Al (1) | 1.9910(8)       | N (2) – Al (1) – O (2) | 178.63(4)      |
|                |                 | N (2) – Al (1) – O (3) | 87.67(4)       |
|                |                 | N (2) – Al (1) – O (5) | 89.94(4)       |
|                |                 | N (2) – Al (1) – O (6) | 88.35(4)       |
|                |                 | O (2) – Al (1) – O (3) | 91.03(4)       |
|                |                 | O (2) – Al (1) – O (5) | 89.83(3)       |
|                |                 | O (2) – Al (1) – O (6) | 92.79(3)       |

**Table S4.** Summary of Crystallographic Refinement Data for complexes **1**, **2** and **3**.

|                                                         | Complex <b>1</b>                                                       | Complex <b>2</b>                                                | Complex <b>3</b>                                                |
|---------------------------------------------------------|------------------------------------------------------------------------|-----------------------------------------------------------------|-----------------------------------------------------------------|
| Local Code                                              | 062ckw17                                                               | 027ap19                                                         | 008rwfk20                                                       |
| Chemical Formula                                        | C <sub>23</sub> H <sub>29</sub> AlN <sub>2</sub> O <sub>4</sub>        | C <sub>23</sub> H <sub>27</sub> CoN <sub>2</sub> O <sub>6</sub> | C <sub>23</sub> H <sub>27</sub> AlN <sub>2</sub> O <sub>6</sub> |
| Formula Weight                                          | 424.46                                                                 | 486.39                                                          | 454.44                                                          |
| Temperature (K)                                         | 150(2)                                                                 | 150.00(16)                                                      | 150.01(15)                                                      |
| Space Group                                             | Orthorhombic,<br><i>P</i> 2 <sub>1</sub> 2 <sub>1</sub> 2 <sub>1</sub> | Monoclinic, <i>P</i> 2 <sub>1</sub> / <i>c</i>                  | Monoclinic, <i>P</i> 2 <sub>1</sub> / <i>c</i>                  |
| <i>a</i> (Å)                                            | 7.86900(10)                                                            | 8.99960(10)                                                     | 8.99580(10)                                                     |
| <i>b</i> (Å)                                            | 15.7511(2)                                                             | 12.8364(2)                                                      | 12.88180(10)                                                    |
| <i>c</i> (Å)                                            | 17.6113(3)                                                             | 19.0472(3)                                                      | 19.2304(2)                                                      |
| $\alpha$ (°)                                            | 90                                                                     | 90                                                              | 90                                                              |
| $\beta$ (°)                                             | 90                                                                     | 96.7450(10)                                                     | 96.6150(10)                                                     |
| $\gamma$ (°)                                            | 90                                                                     | 90                                                              | 90                                                              |
| <i>V</i> (Å <sup>3</sup> )                              | 2182.84(5)                                                             | 2185.15(5)                                                      | 2213.62(4)                                                      |
| <i>Z</i>                                                | 4                                                                      | 4                                                               | 4                                                               |
| <i>D</i> <sub>calcd</sub> (Mg/m <sup>3</sup> )          | 1.292                                                                  | 1.478                                                           | 1.364                                                           |
| Crystal Size (mm)                                       | 0.17*0.17*0.24                                                         | 0.19*0.22*0.39                                                  | 0.11*0.26*0.29                                                  |
| Theta range for data collection                         | 3.765 to 75.942                                                        | 4.1230 to 76.0760                                               | 4.0910 to 76.0720                                               |
| $\mu$ (mm <sup>-1</sup> )                               | 1.08                                                                   | 6.53                                                            | 1.17                                                            |
| Reflections collected                                   | 9972                                                                   | 12050                                                           | 23912                                                           |
| Unique reflections                                      | 4237                                                                   | 4529                                                            | 4605                                                            |
| Data completeness to [ $\theta$ ]                       | 74.33                                                                  | 74.33                                                           | 74.33                                                           |
| <i>R</i> <sub>int</sub>                                 | 0.034                                                                  | 0.031                                                           | 0.028                                                           |
| Final <i>R</i> 1 [ <i>I</i> > 2 $\sigma$ ( <i>I</i> )]  | 0.031                                                                  | 0.034                                                           | 0.036                                                           |
| Final <i>wR</i> 2 [ <i>I</i> > 2 $\sigma$ ( <i>I</i> )] | 0.0957                                                                 | 0.0807                                                          | 0.0812                                                          |
| Goodness-of-fit on <i>F</i> <sup>2</sup>                | 1.039                                                                  | 1.072                                                           | 1.070                                                           |
| <i>R</i> 1 values (all data)                            | 0.0391                                                                 | 0.0375                                                          | 0.0344                                                          |

|                       |        |        |       |
|-----------------------|--------|--------|-------|
| wR2 values (all data) | 0.0980 | 0.0830 | 0.083 |
|-----------------------|--------|--------|-------|

### Representative Polymerization

Inside a nitrogen filled glovebox, the catalyst, co-catalyst, chain transfer agent and desired monomers were added to a dried vial equipped with a magnetic stirrer bar. The vial was sealed with a melamine-cap containing a Teflon inlay, and further sealed with first Parafilm M and then electrical insulation tape. This sealed vial was then heated to 100 °C for the time stated. Aliquoting was performed inside the glovebox by removing *ca.* 10  $\mu$ L of the polymerisation mixture with a syringe. The polymerisations were quenched by exposing the reaction mixture to air, followed by removal of volatiles. A  $^1\text{H}$  NMR spectrum of the crude product was measured in  $\text{CDCl}_3$ . GPC samples were prepared by dissolving approx. 10 mg of the crude product in 1 mL HPLC grade THF and filtered before use.

### End Group Analysis by $^{31}\text{P}\{^1\text{H}\}$ NMR Spectroscopy

Analysis of the hydroxyl polymer end groups was carried out following a reported procedure.<sup>10</sup> In an NMR tube, the triblock polyester (40 mg), purified *via* precipitation from methanol, was added to of a stock solution (40  $\mu$ L of a solution make from pyridine (10 mL), bisphenol A (400 mg) and  $\text{Cr}(\text{acac})_3$  (5.5 mg) and 2-chloro-4,4,5,5-tetramethyldioxaphospholane (40 mg), in  $\text{CDCl}_3$  (0.5 mL). The mixture was allowed to react at room temperature for 6 hours before  $^{31}\text{P}\{^1\text{H}\}$  NMR spectra were recorded.

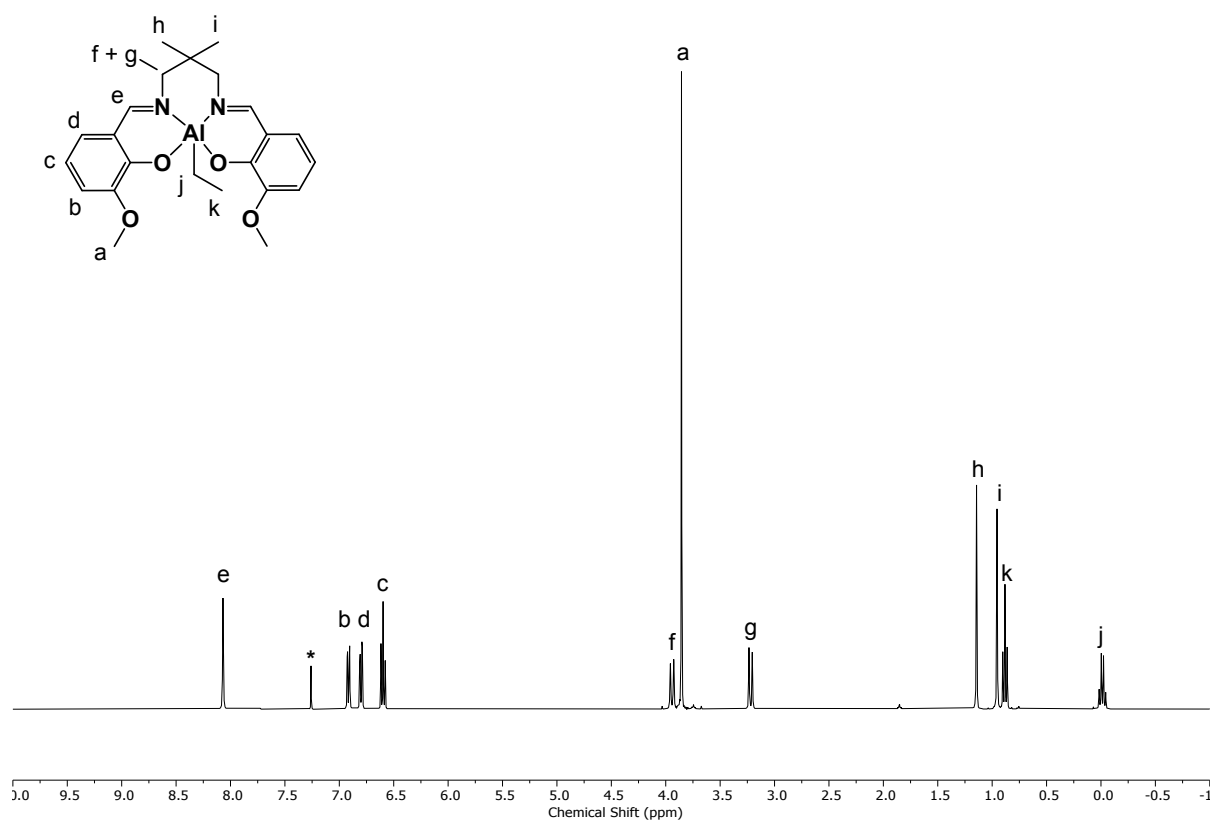

**Figure S1.** <sup>1</sup>H NMR Spectrum (400 MHz, 298 K, CDCl<sub>3</sub> (\*)) of complex **1**.

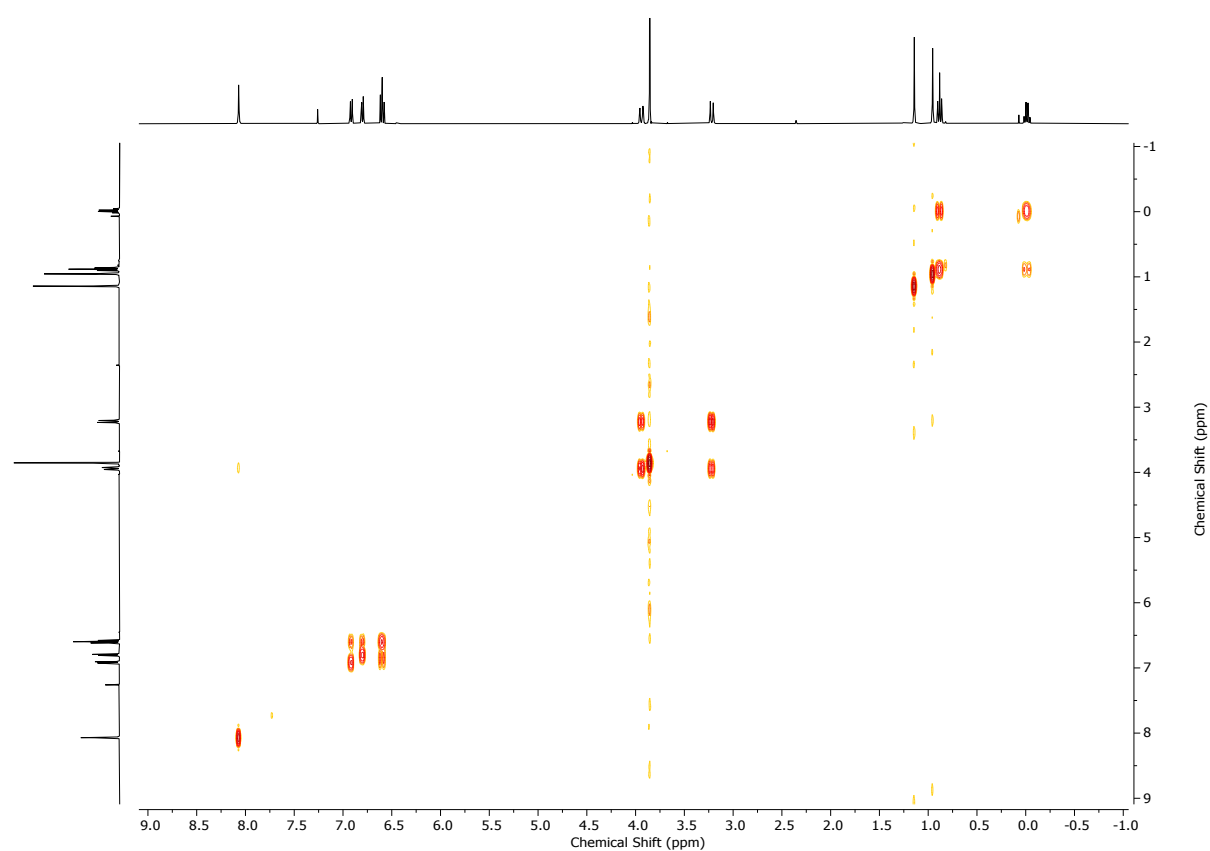

**Figure S2.** <sup>1</sup>H COSY NMR Spectrum (400 MHz, 298 K, CDCl<sub>3</sub>) of complex **1**.

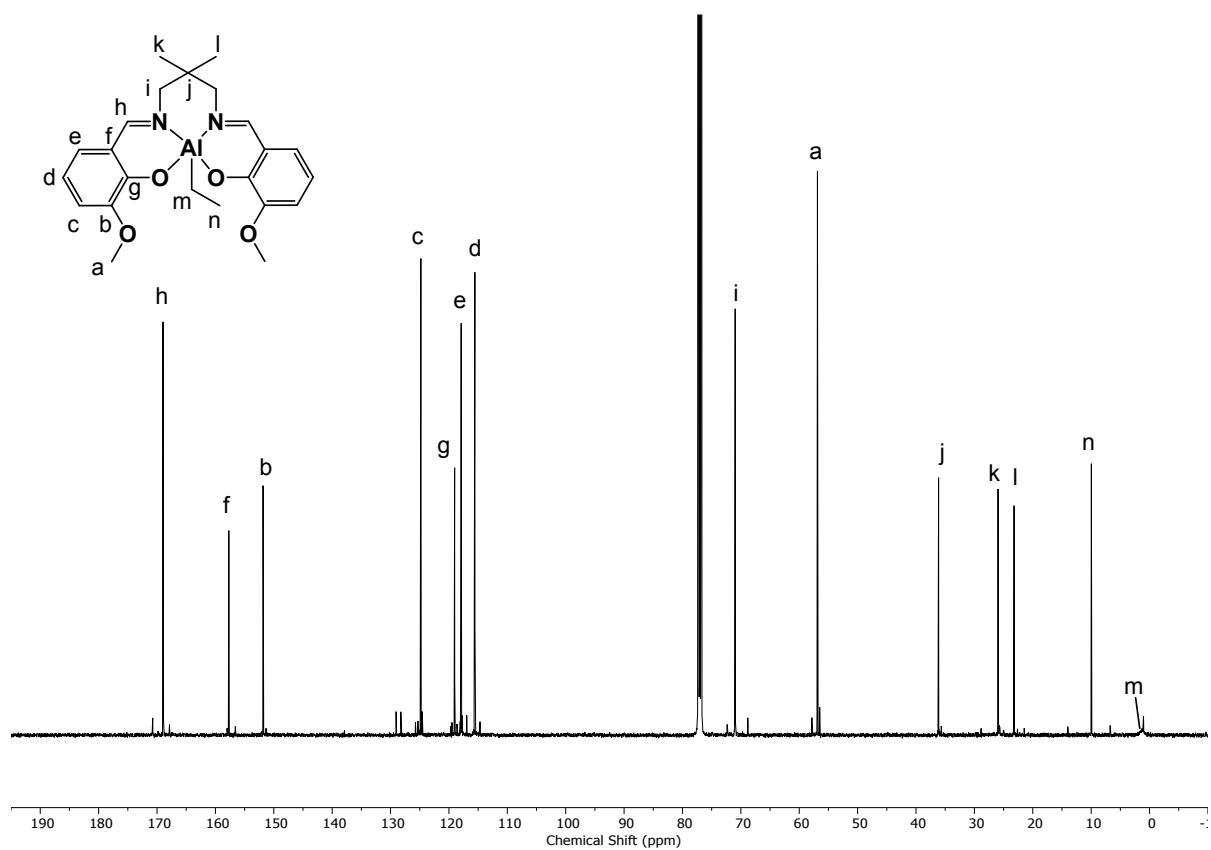

**Figure S3.**  $^{13}\text{C}\{^1\text{H}\}$  NMR Spectrum (500 MHz, 298 K,  $\text{CDCl}_3$ (\*)) of complex **1**. (*N.b.* Carbon M is broadened due to coupling to the quadrupolar Al nucleus).

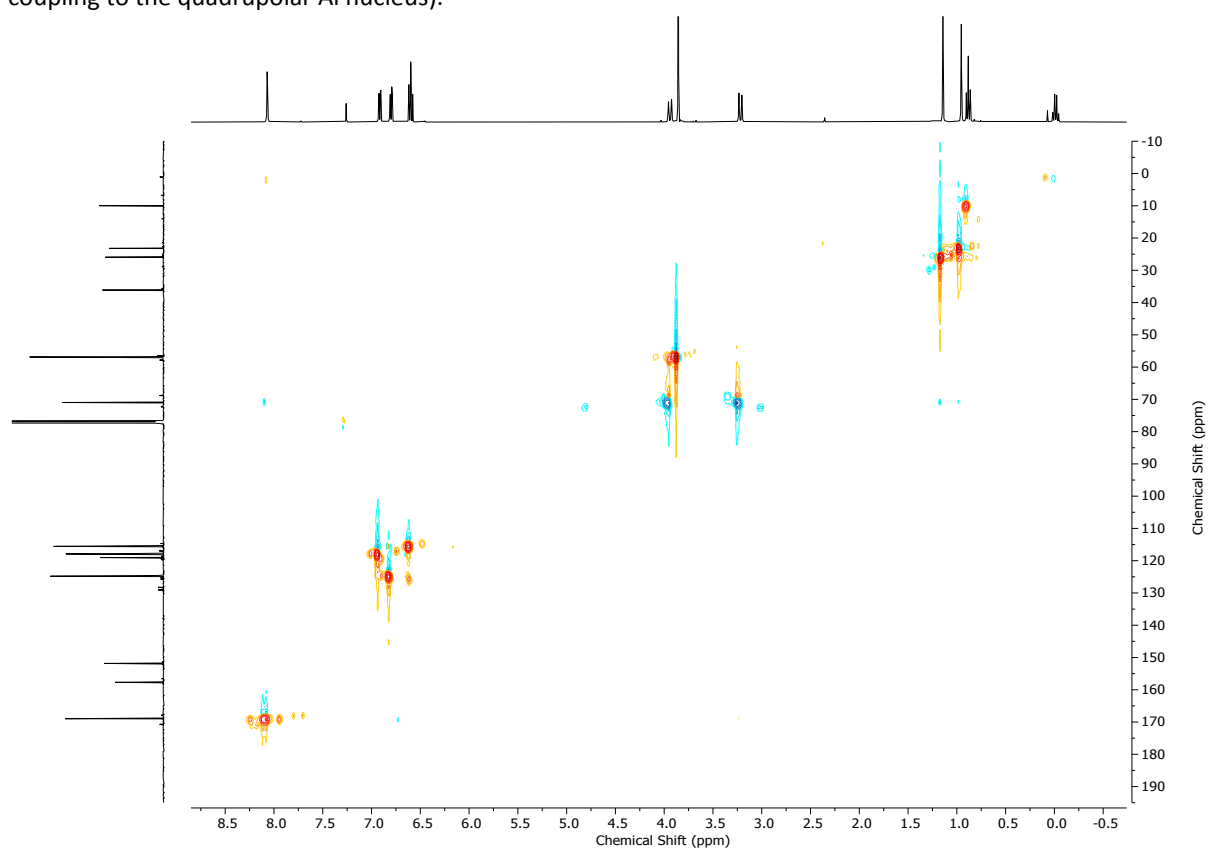

**Figure S4.**  $^1\text{H}$ - $^{13}\text{C}$  HSQC NMR Spectrum (298 K,  $\text{CDCl}_3$ ) of complex **1**.

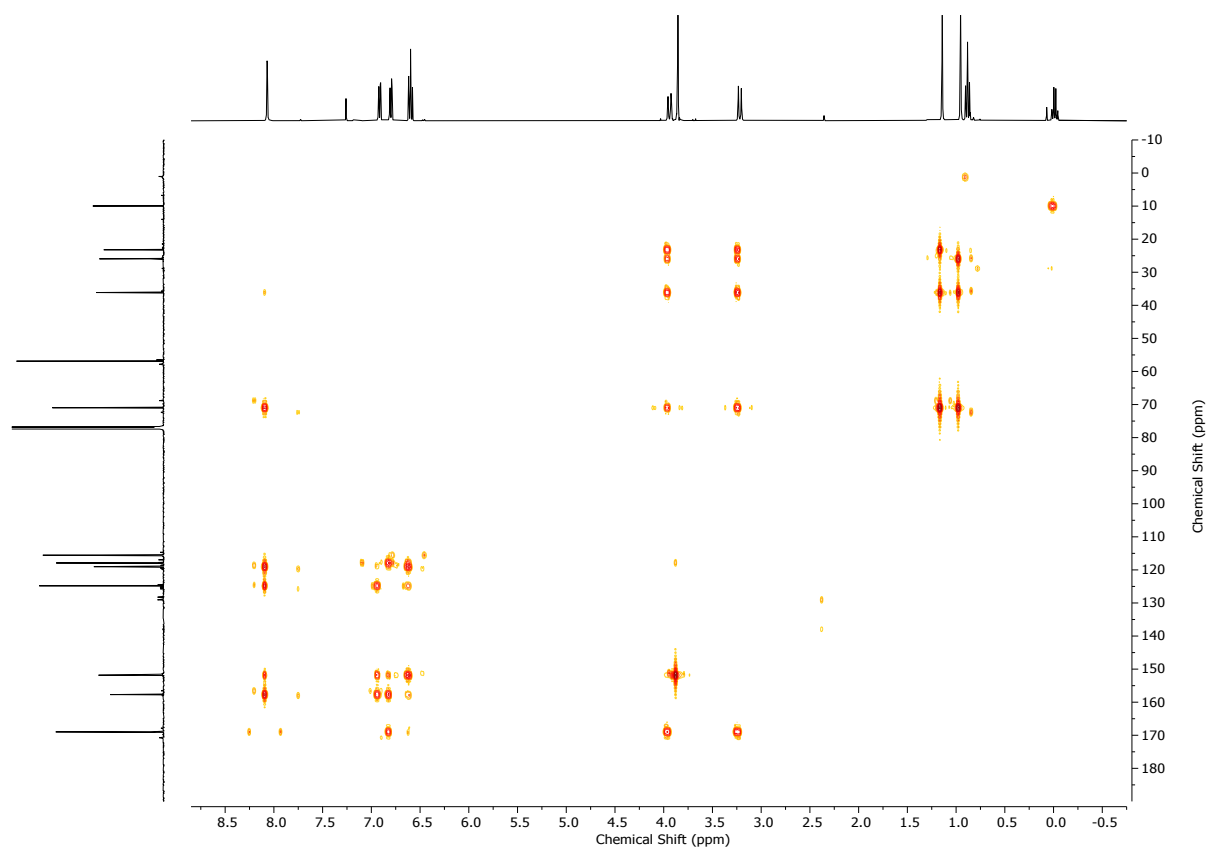

**Figure S5.**  $^1\text{H}$ - $^{13}\text{C}$  HMBC NMR Spectrum (298 K,  $\text{CDCl}_3$ ) of complex **1**.

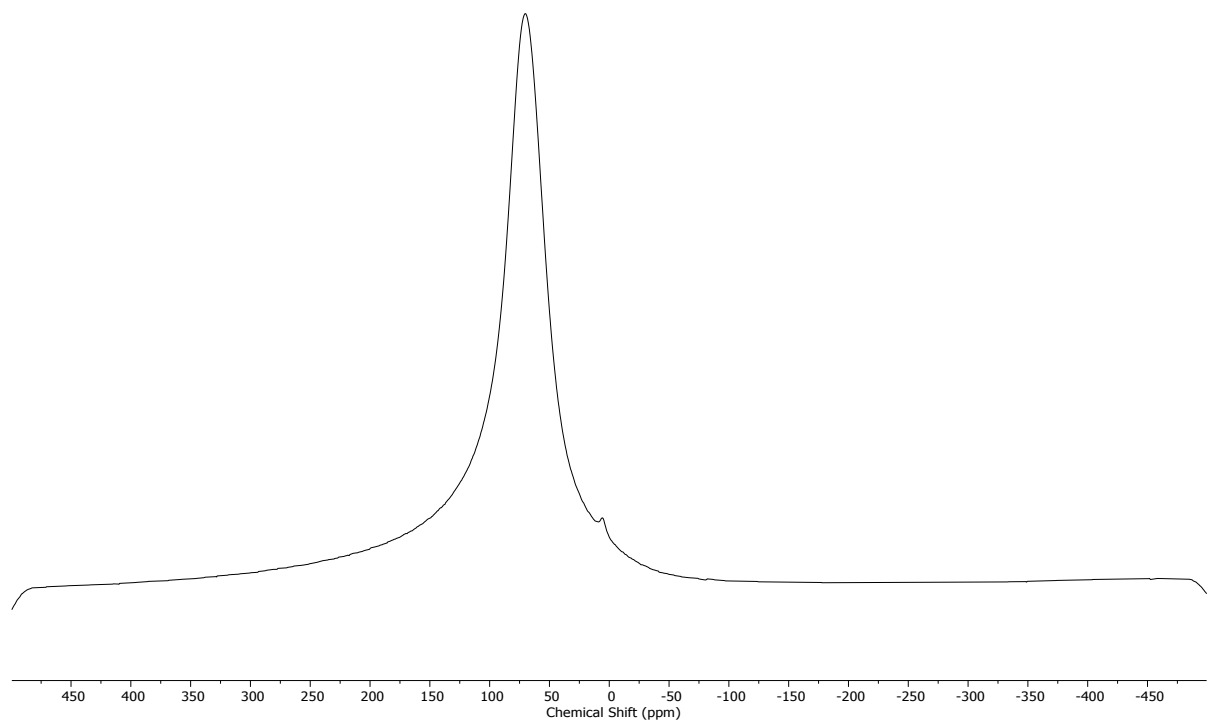

**Figure S6.**  $^{27}\text{Al}$  NMR Spectrum (104 MHz, 298 K,  $\text{CDCl}_3$ ) of complex **1**.

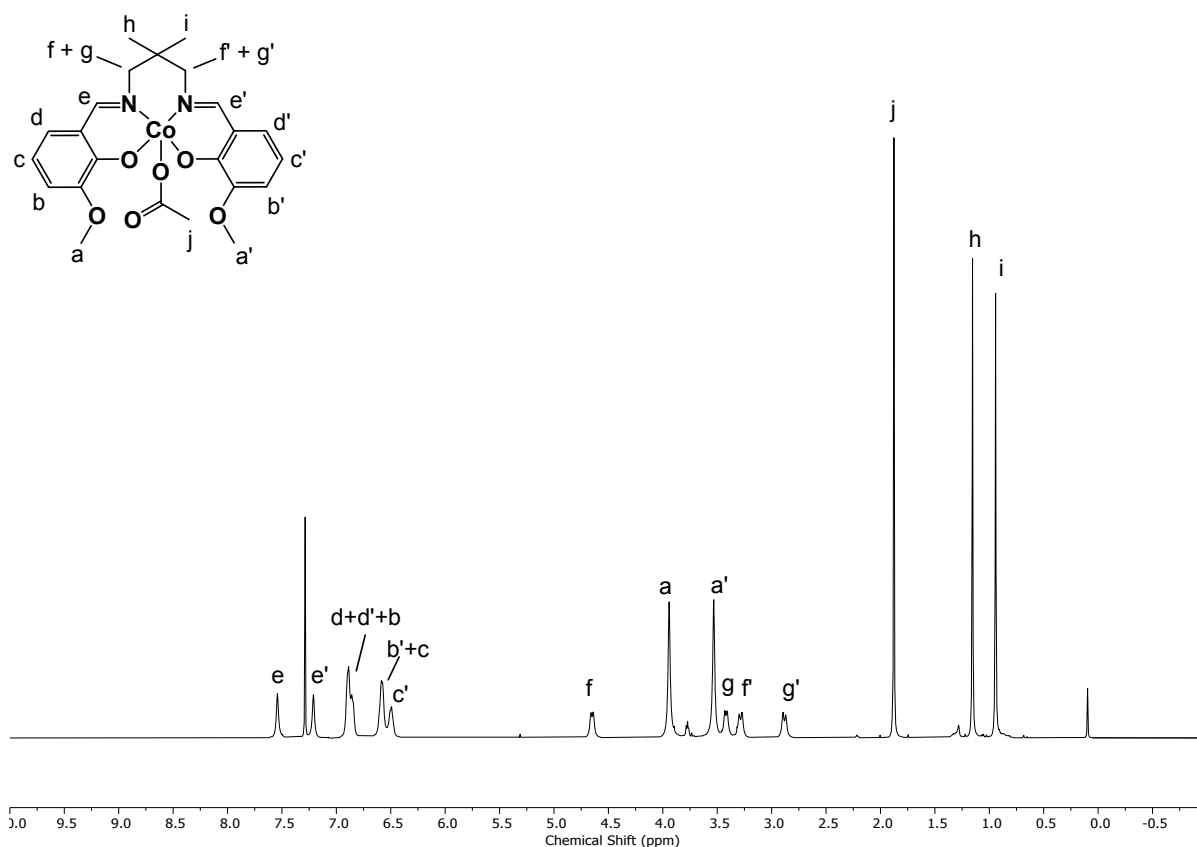

**Figure S7.**  $^1\text{H}$  NMR Spectrum (400 MHz, 298 K,  $\text{CDCl}_3$ (\*)) of complex **2**.

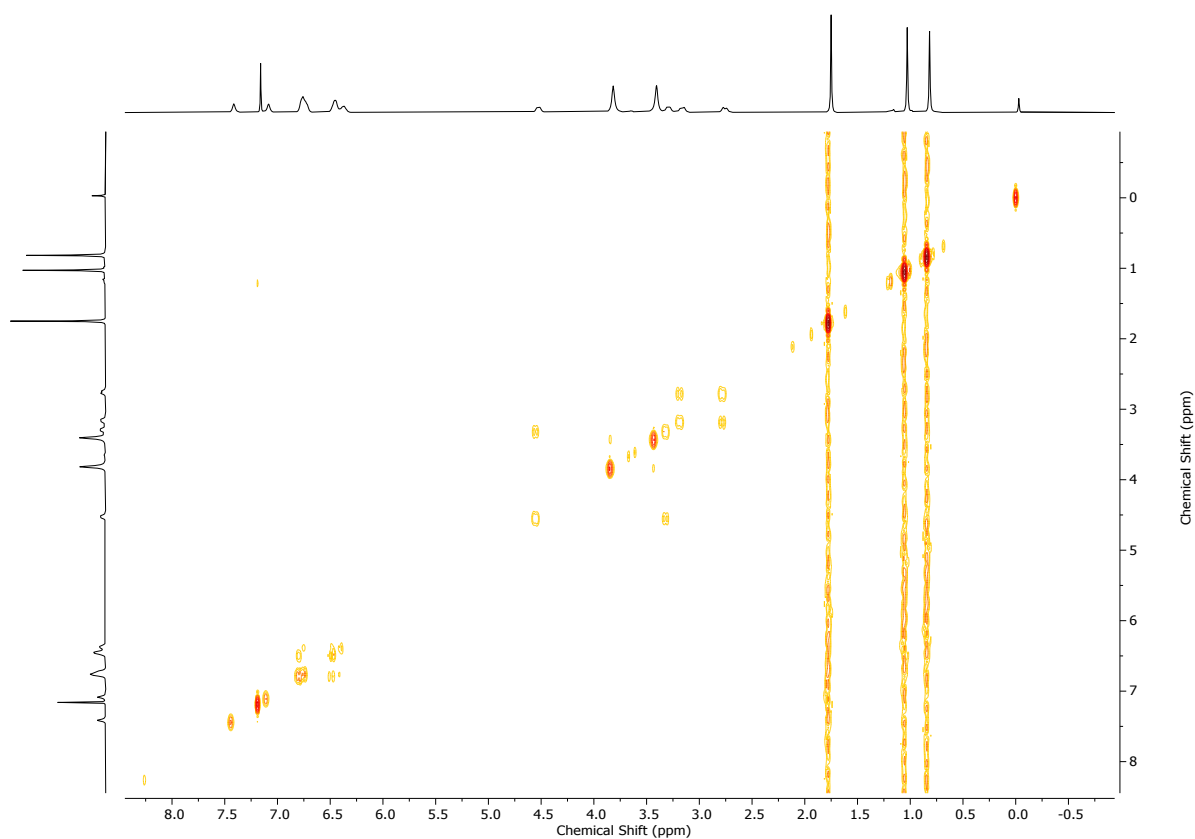

**Figure S8.**  $^1\text{H}$  COSY NMR Spectrum (400 MHz, 298 K,  $\text{CDCl}_3$ ) of complex **2**.

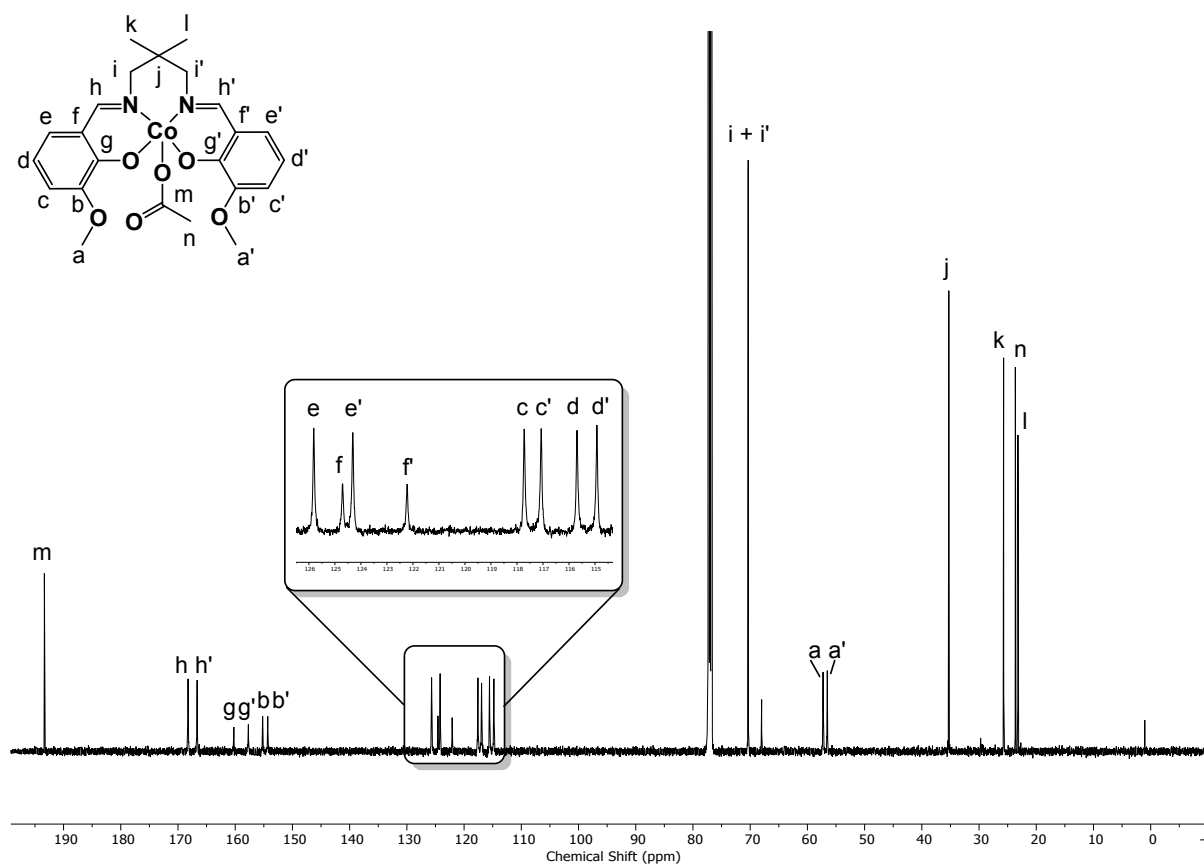

**Figure S9.**  $^{13}\text{C}\{^1\text{H}\}$  NMR Spectrum (500 MHz, 298 K,  $\text{CDCl}_3$ (\*)) of complex **2**.

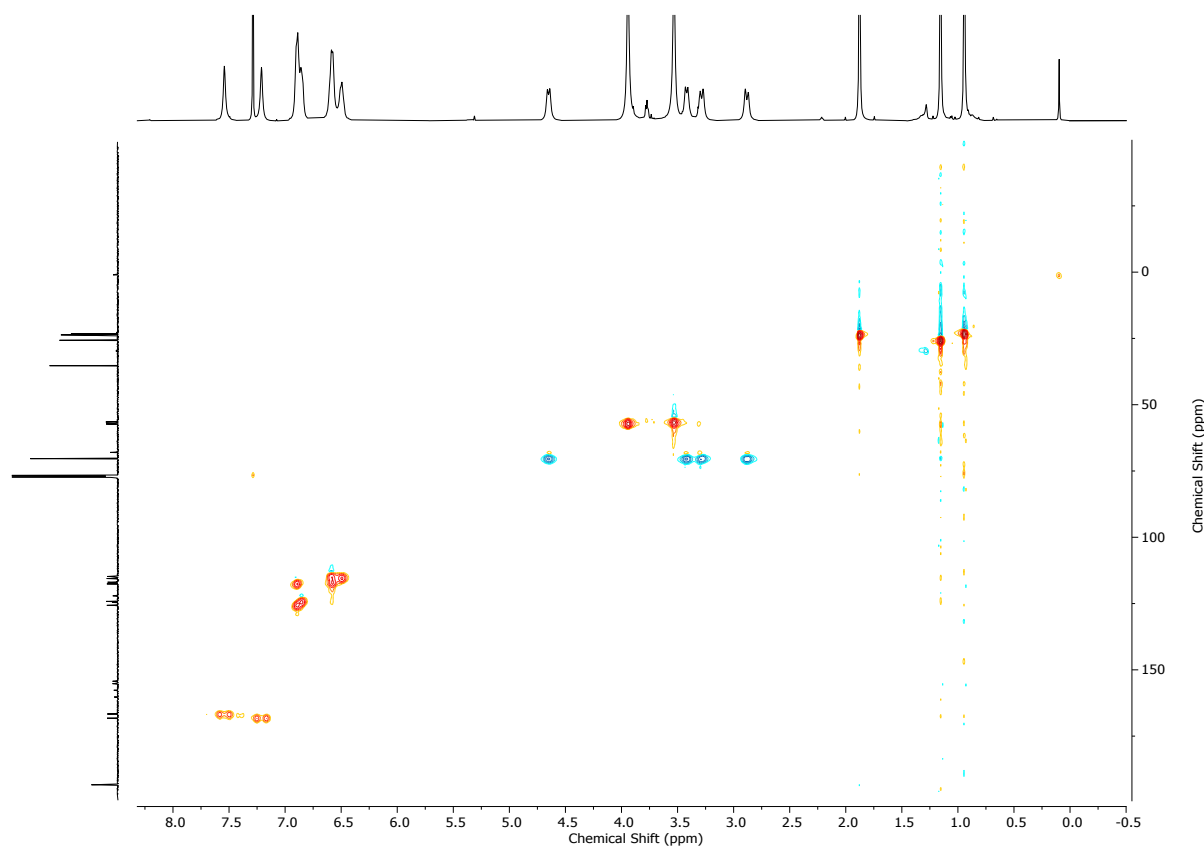

**Figure S10.**  $^1\text{H}$ - $^{13}\text{C}$  HSQC NMR Spectrum (298 K,  $\text{CDCl}_3$ ) of complex **2**.



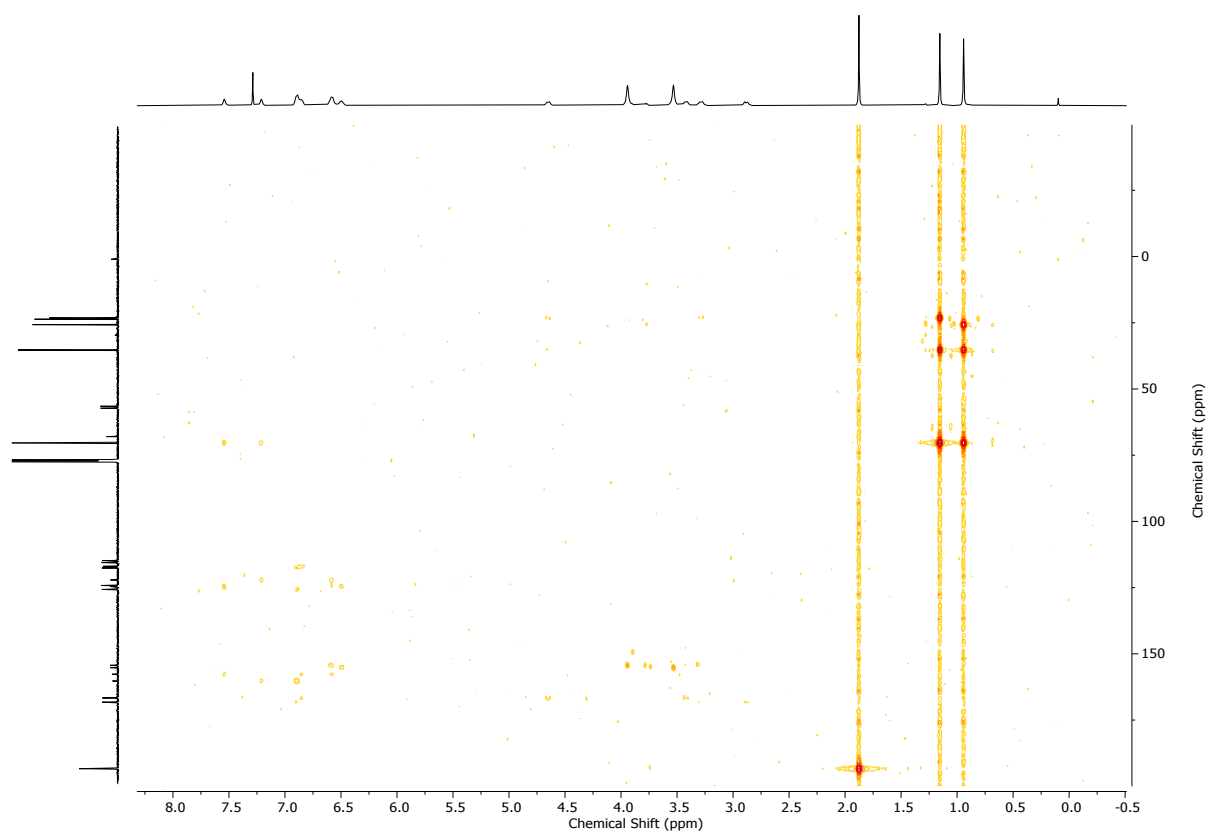

**Figure S11.**  $^1\text{H}$ - $^{13}\text{C}$  HMBC NMR Spectrum (298 K,  $\text{CDCl}_3$ ) of complex **2**.

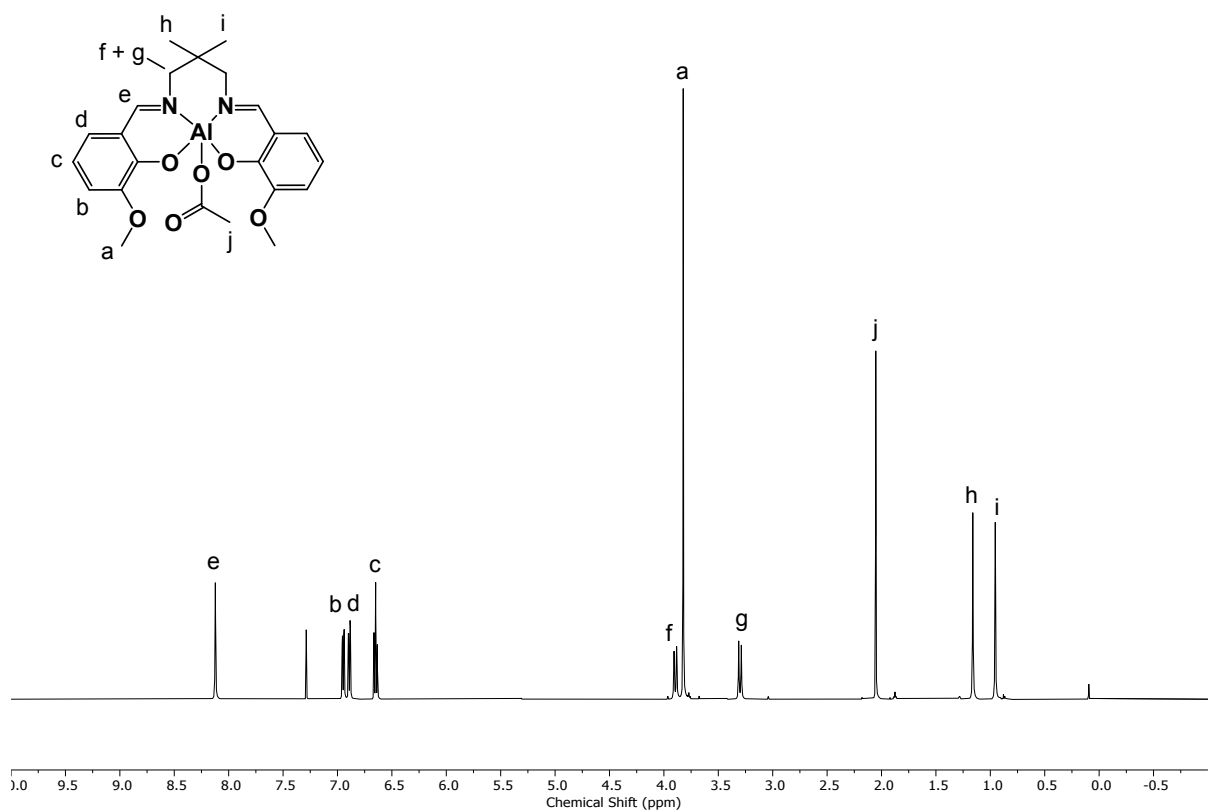

**Figure S12.**  $^1\text{H}$  NMR Spectrum (400 MHz, 298 K,  $\text{CDCl}_3$ (\*)) of complex **3**.

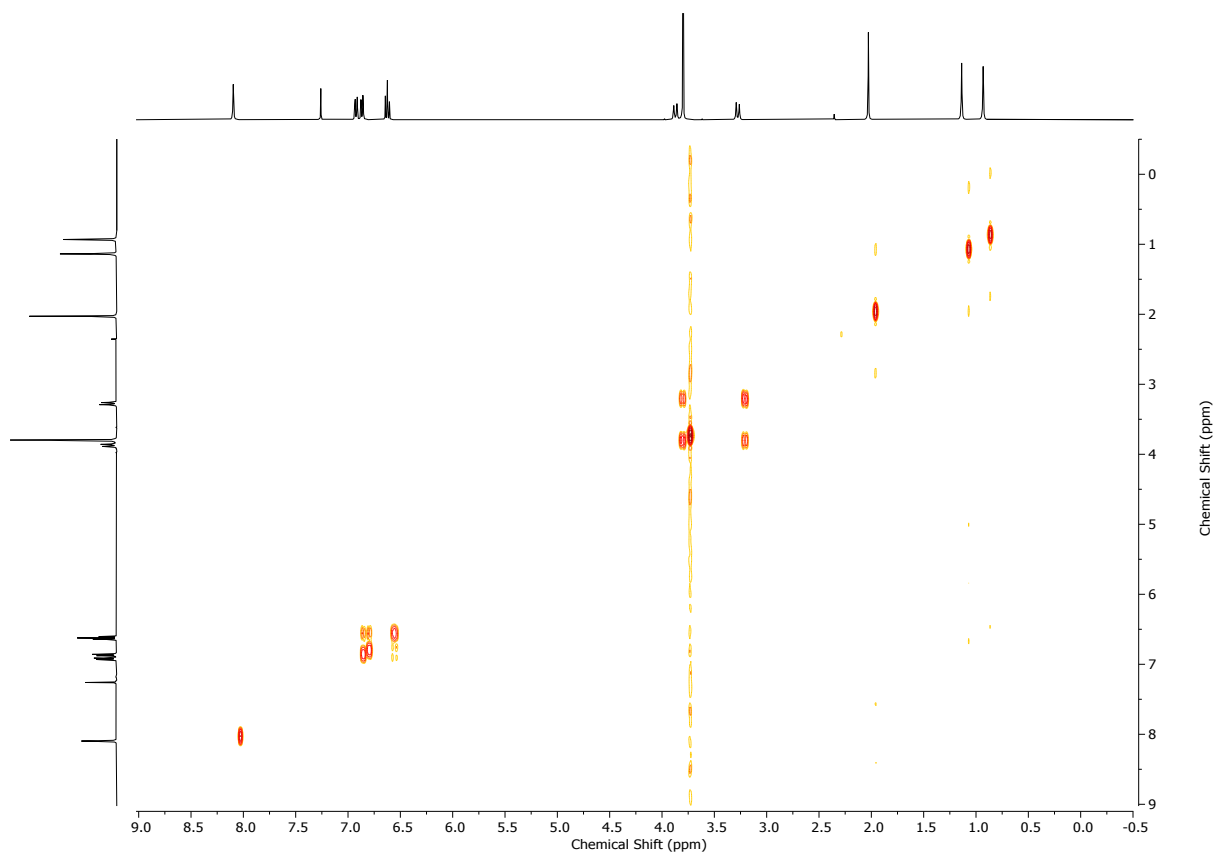

**Figure S13.**  $^1\text{H}$  COSY NMR Spectrum (400 MHz, 298 K,  $\text{CDCl}_3$ ) of complex **3**.

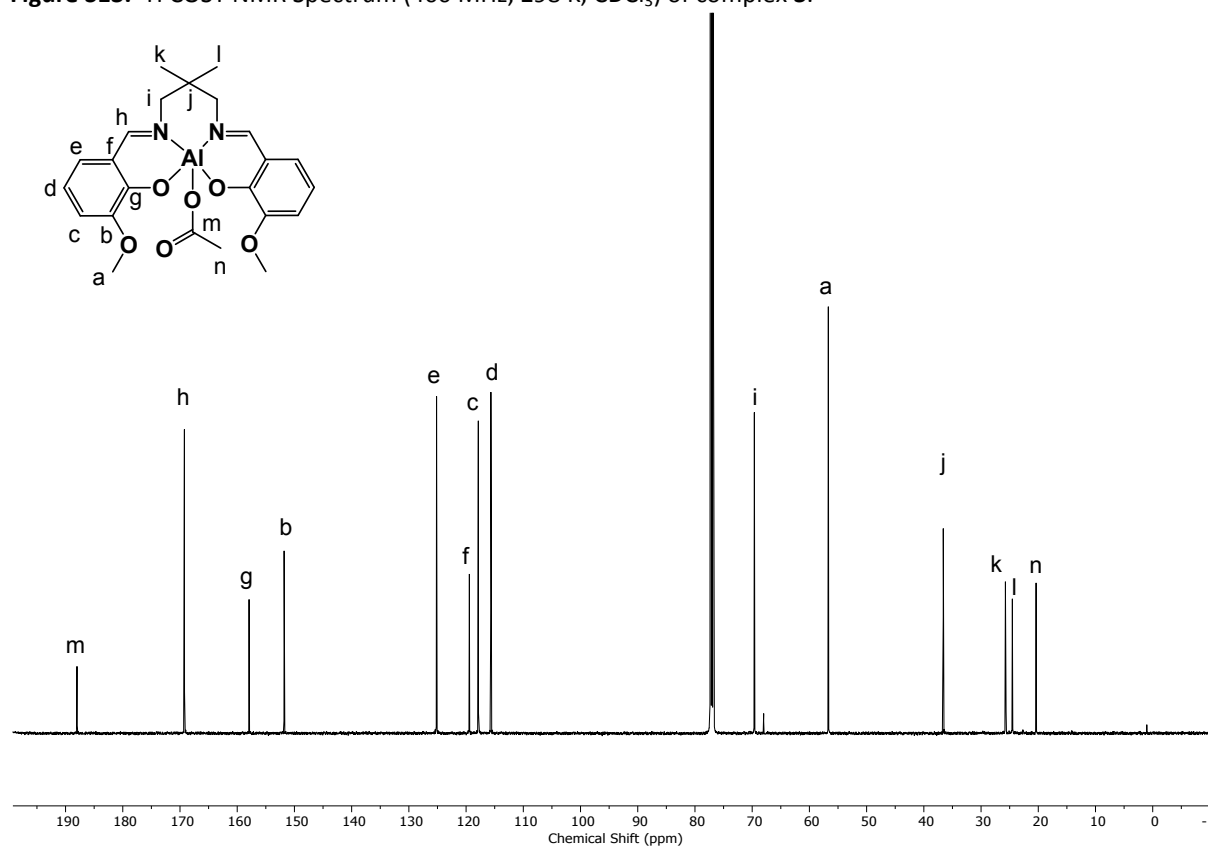

**Figure S14.**  $^{13}\text{C}\{^1\text{H}\}$  NMR Spectrum (500 MHz, 298 K,  $\text{CDCl}_3$ ) of complex **3**.

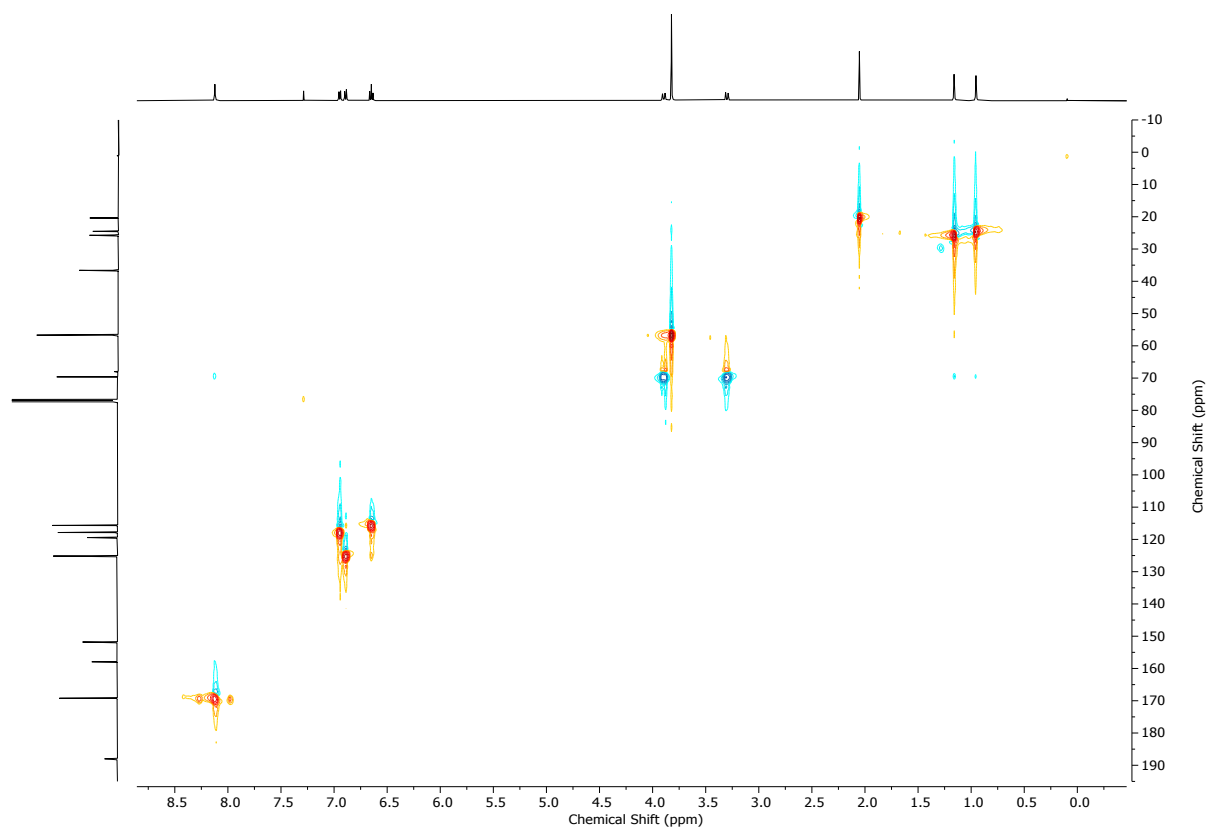

**Figure S15.**  $^1\text{H}$ - $^{13}\text{C}$  HSQC NMR Spectrum (298 K,  $\text{CDCl}_3$ ) of complex **3**.

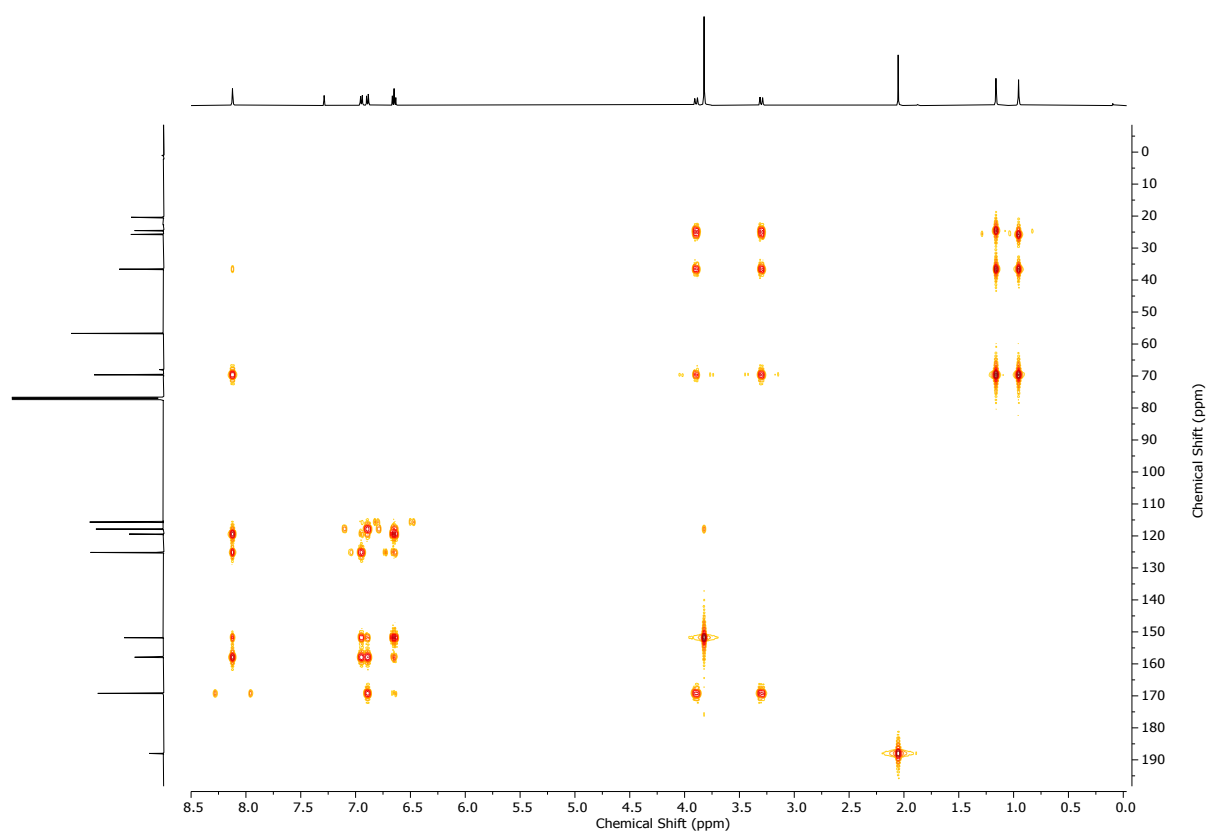

**Figure S16.**  $^1\text{H}$ - $^{13}\text{C}$  HMBC NMR Spectrum (298 K,  $\text{CDCl}_3$ ) of complex **3**.

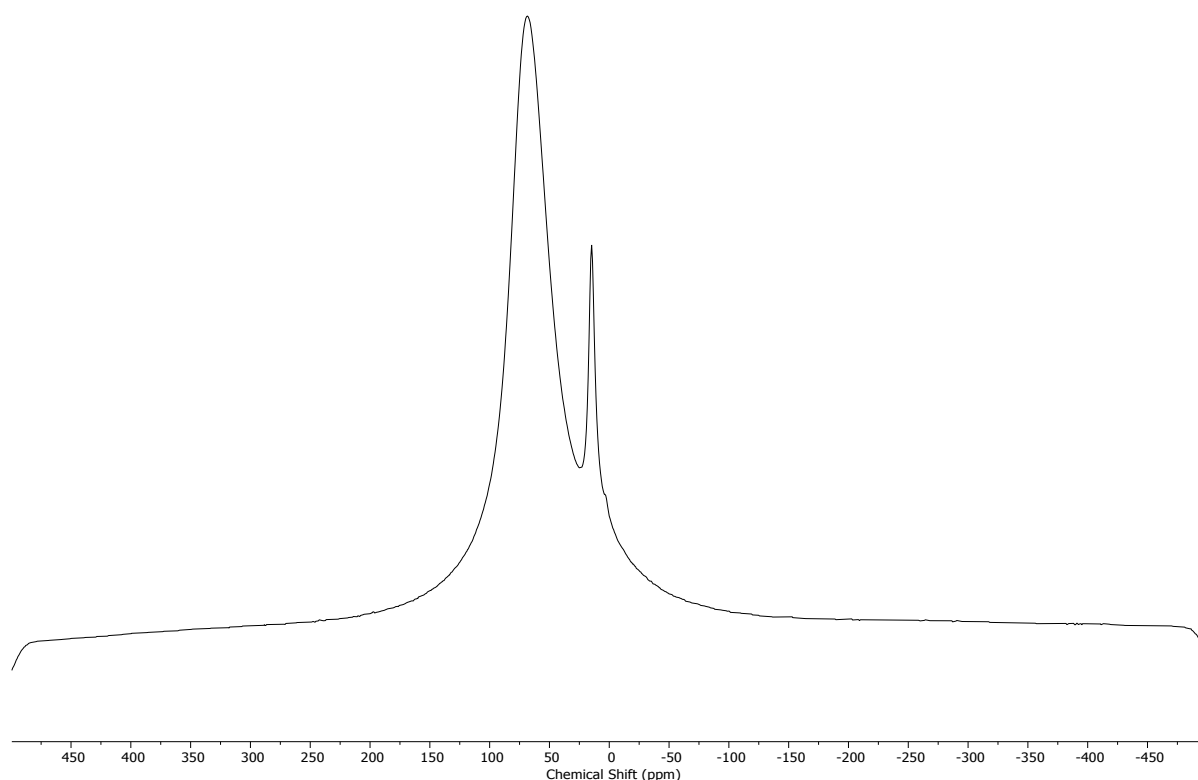

**Figure S17.**  $^{27}\text{Al}$  NMR Spectrum (104 MHz, 298 K,  $\text{CDCl}_3$ ) of complex **3**.

**Table S5.** Polymerisation data for the ROCOP of PA and CHO Utilising Complexes **1**, **2** and SalcyCrCl showing complete PA consumption.

| Catalyst <sup>a</sup> | Time (m) | Conv. (%) | $M_{n, \text{GPC}} [\text{Đ}]^b$<br>( $\text{kg mol}^{-1}$ ) | $M_{n, \text{Theory}}^c$<br>( $\text{kg mol}^{-1}$ ) |
|-----------------------|----------|-----------|--------------------------------------------------------------|------------------------------------------------------|
| <b>1</b>              | 15       | 100       | 7.5 [1.16]                                                   | 8.2                                                  |
| <b>2</b>              | 15       | 100       | 6.5 [1.27]                                                   | 6.2                                                  |
| SalcyCrCl             | 10       | 100       | 5.1 [1.27]                                                   | 6.2                                                  |

<sup>a</sup> Catalysis conditions:  $[\text{Cat}]:[\text{PPNCl}]:[\text{CHD}]:[\text{PA}]:[\text{CHO}] = 1:1:2:100:500$ , given,  $T = 100\text{ }^\circ\text{C}$ . <sup>b</sup> Determined by GPC, in THF, using narrow dispersity polystyrene standards. <sup>c</sup> Theoretical  $M_n$  values. Determined through  $(\text{TON} * M_n(\text{Repeat Unit})) / (\text{Number of equivalents of CHD} + \text{Number of equivalents of PPNCl} (+ \text{Number of equivalents of catalyst when } \mathbf{2} \text{ and SalcyCrCl are utilised}))$ .

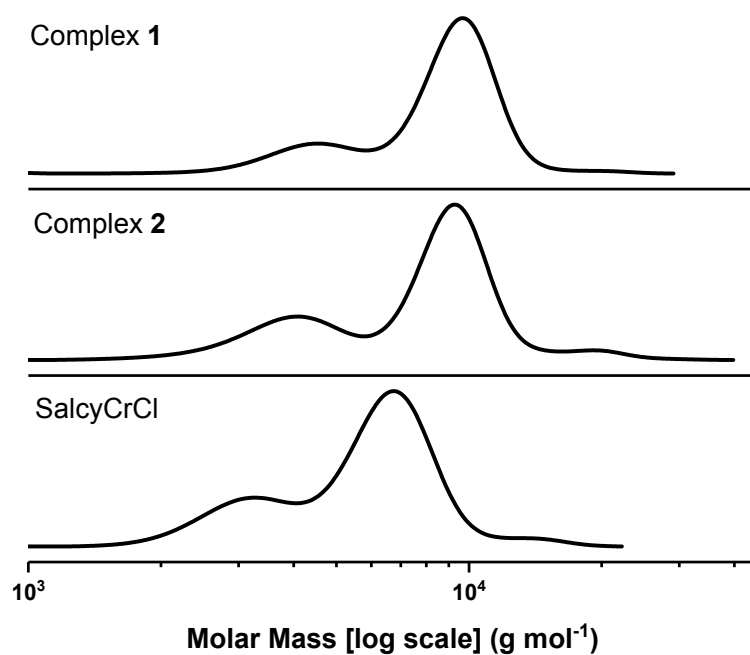

**Figure S18.** GPC traces for PCHPE synthesised by complexes **1**, **2**, and [SalcyCrCl], corresponding to Table S1, Entries 1, 2, and 3, respectively.

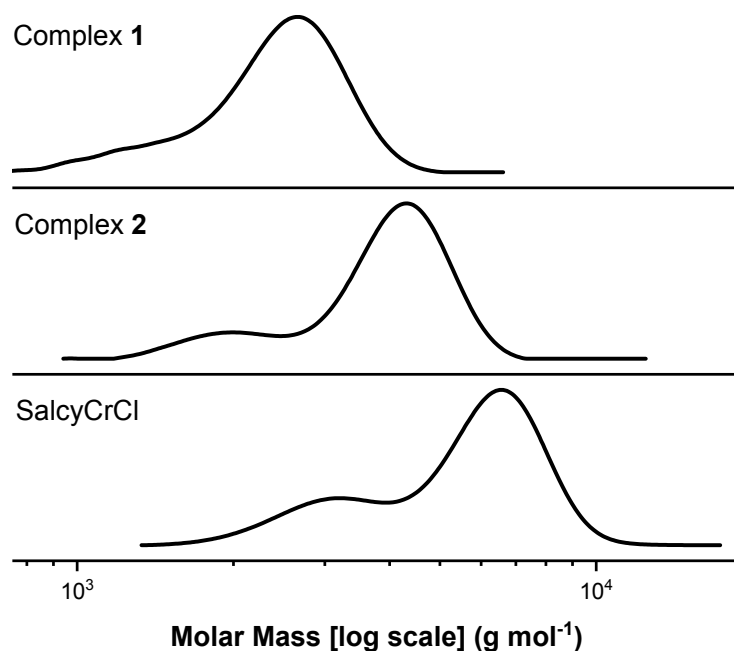

**Figure S19.** GPC traces for PCHPE synthesised by complexes **1**, **2**, and [SalcyCrCl], corresponding to Table 1, Entries 1, 2, and 3, respectively.

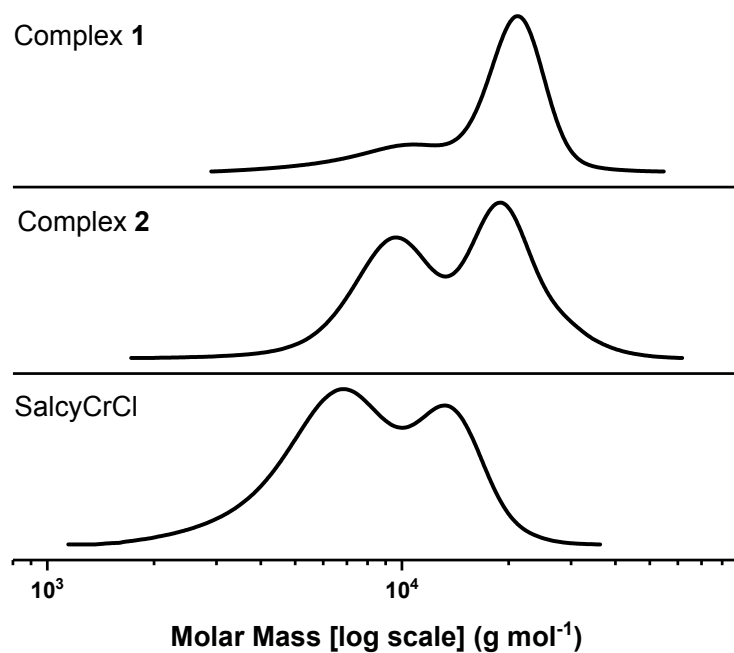

**Figure S20.** GPC traces for PCHPE synthesised by complexes **1**, **2**, and [SalcyCrCl], corresponding to Table 1, Entries 4, 5, and 6, respectively.

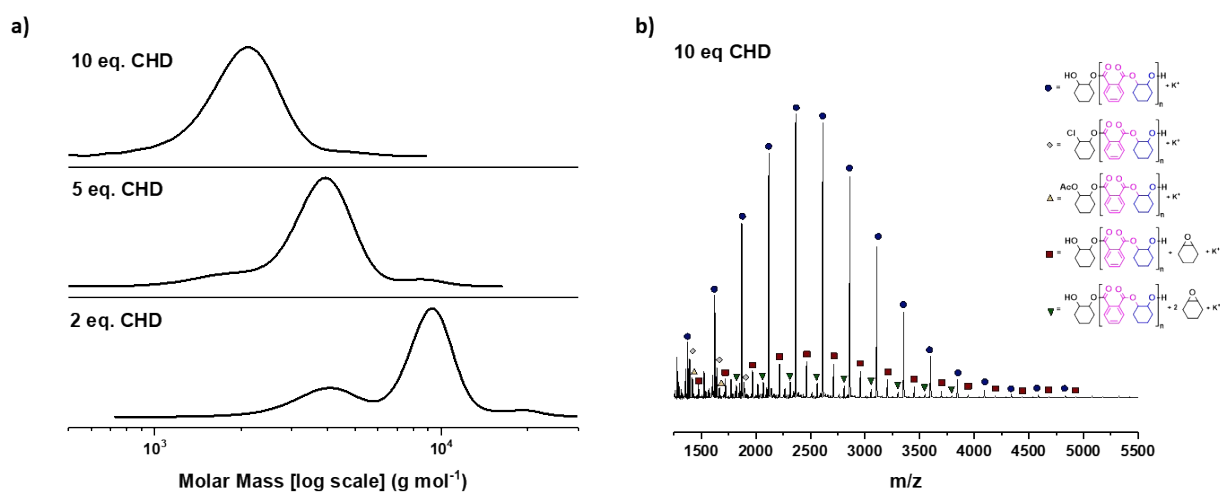

**Figure S21.** a) GPC traces for PCHPE synthesised with complex **2**, showing that 10 equivalents are necessary to yield monomodal molecular weight distributions. b) MALDI-ToF spectrum of PCHPE synthesised with 10 equivalents of CHD.

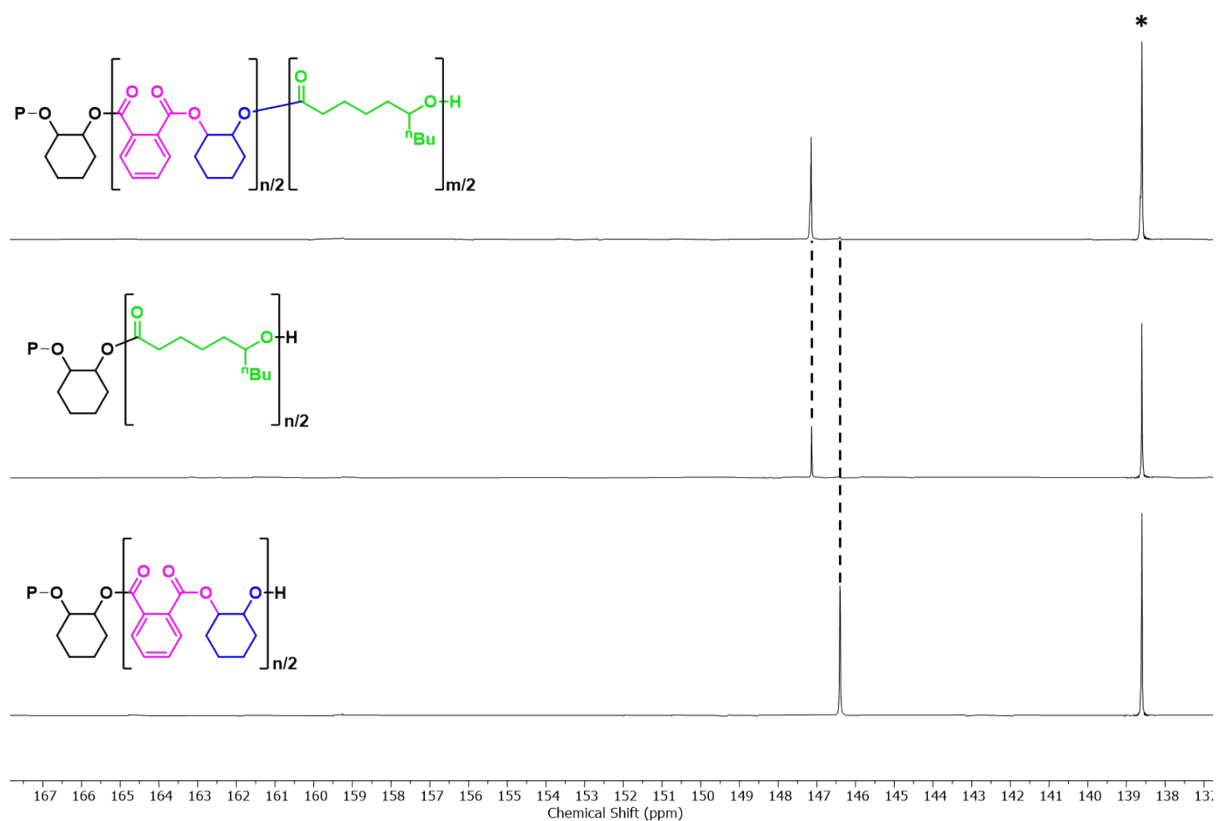

**Figure S22.**  $^{31}\text{P}\{^1\text{H}\}$  NMR Spectrum (298 K, 162 MHz,  $\text{CDCl}_3$ ) of PDL-*b*-PCHPE-*b*-PDL (Table 2, Entry 1), and the corresponding spectra for PDL and PCHPE homopolymers.

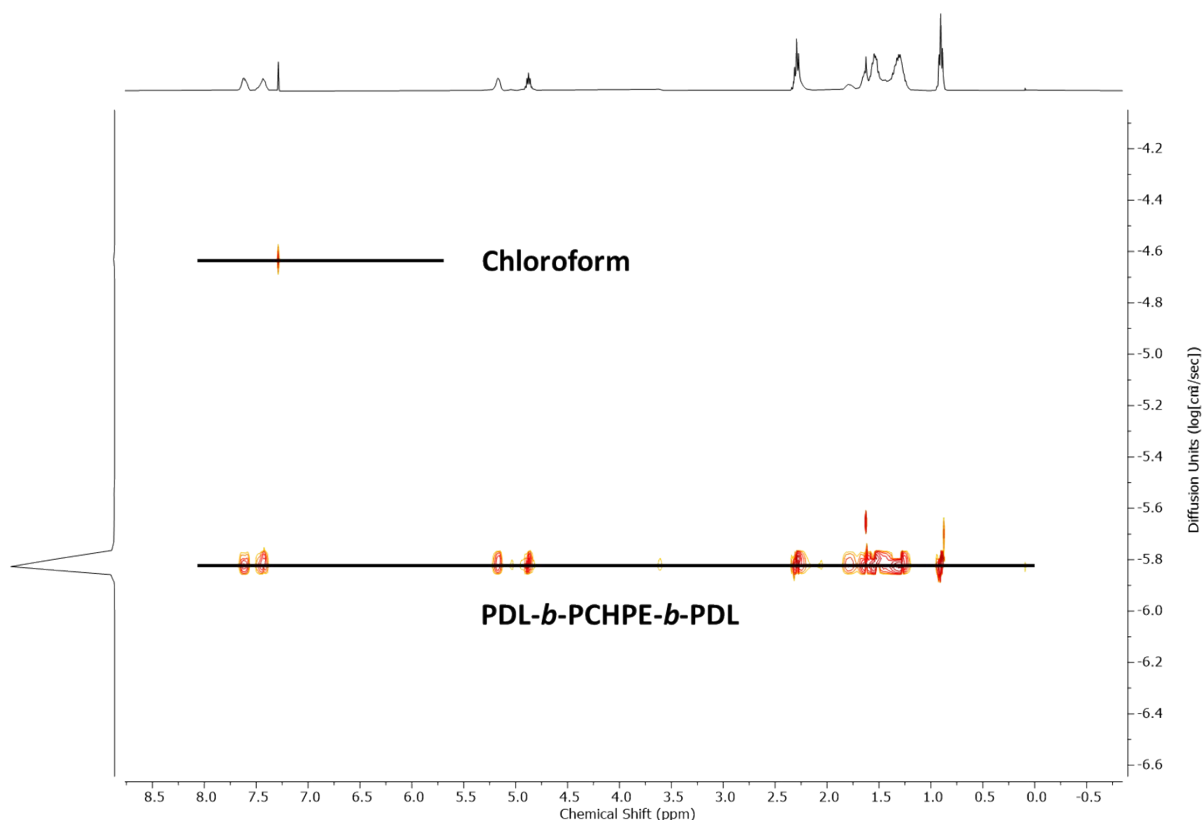

**Figure S23.** DOSY NMR Spectrum (298 K,  $\text{CDCl}_3$ ) of PDL-*b*-PCHPE-*b*-PDL (Table 2, Entry 1) showing a single diffusion coefficient, consistent with formation of a triblock copolymer. Previous reports have shown that DOSY NMR spectra of a 50:50 wt% blend of PDL and PCHPE homopolymers show two separate diffusion coefficients.<sup>11</sup>

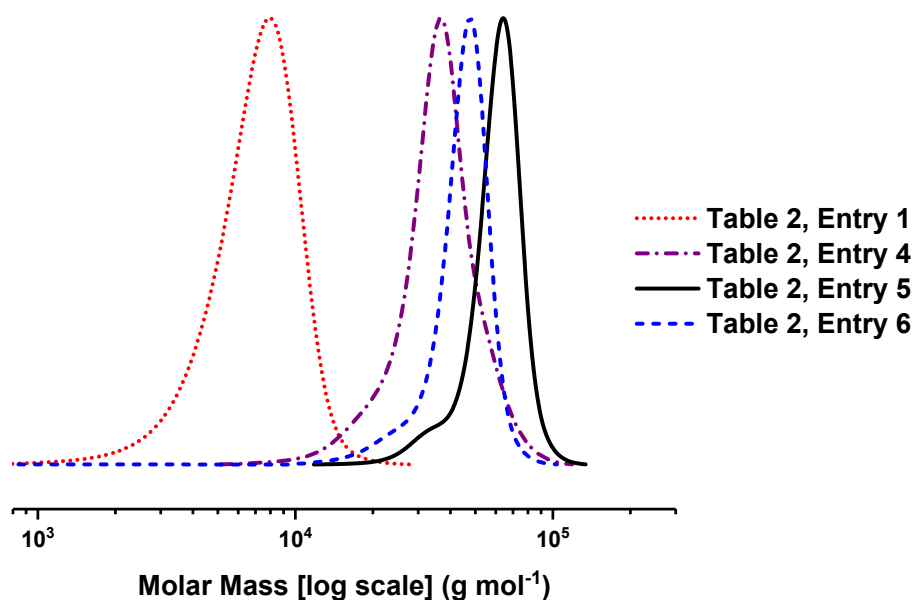

**Figure S24.** GPC traces for triblock copolymers synthesised with complex 1, at various catalyst loadings (Entries 1, 4 and 5) and equivalents of CTA (Entry 6).



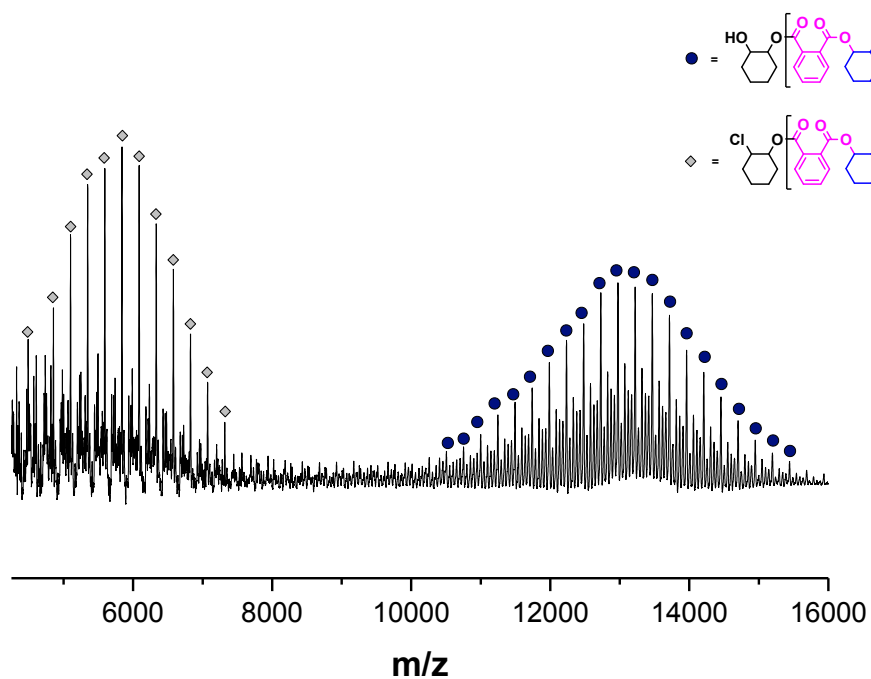

**Figure S25.** MALDI-ToF spectrum of PCHPE synthesised during switchable catalysis (Table 2, Entry 5) before initiation of DL ROP, showing the low weight shoulder to be due to initiation from chloride anions.

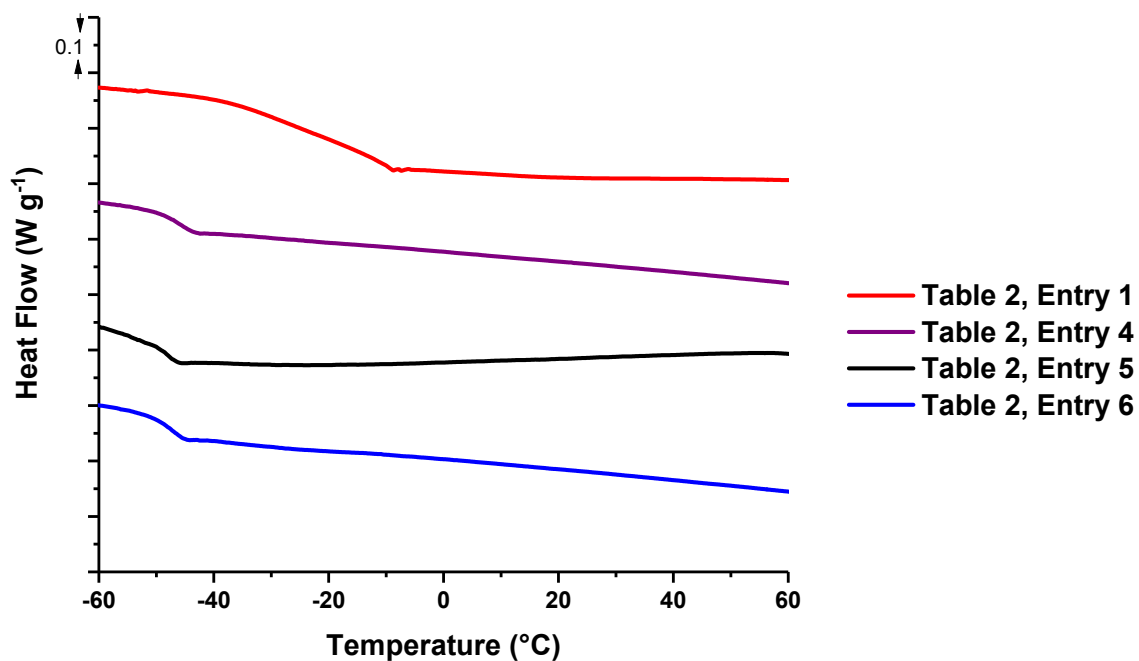

**Figure S26.** DSC heating curves for triblock synthesised with complex **1**, showing the  $T_g$  for the PDL block.

## References

1. O. Hauenstein, M. Reiter, S. Agarwal, B. Rieger and A. Greiner, *Green Chem.*, 2016, **18**, 760-770.

2. A. Thevenon, J. A. Garden, A. J. White and C. K. Williams, *Inorg. Chem.*, 2015, **54**, 11906-11915.
3. J. Cosier and A. M. Glazer, *J. Appl. Cryst.*, 1986, **19**, 105-107.
4. CrysAlisPRO, Oxford Diffraction /Agilent Technologies UK Ltd, Yarnton, England.
5. L. J. Farrugia, *J. Appl. Crystallogr.*, 2012, **45**, 849-854.
6. G. M. Sheldrick, *Acta Crystallogr. Sect. A: Found. Crystallogr.*, 2008, **64**, 112-122.
7. G. M. Sheldrick, *Acta Cryst.*, 2015, **C71**, 3-8.
8. a) SHELXTL v5.1, Bruker AXS, Madison, WI, 1998. b) Sheldrick, G. M., *Acta. Cryst.*, 2015, **A71**, 3-8.
9. O. V. Dolomanov, L. J. Bourhis, R. J. Gildea, J. A. K. Howard and H. Puschmann, *J. Appl. Cryst.*, 2009, **42**, 339-341.
10. A. Spyros, D. S. Argyropoulos and R. H. Marchessault, *Macromolecules*, 1997, **30**, 327-329.
11. G. L. Gregory, G. S. Sulley, L. P. Carrodeguas, T. T. D. Chen, A. Santmarti, N. J. Terrill, K.-Y. Lee and C. K. Williams, *Chem. Sci.*, 2020, **11**, 6567-6581.
